## Language barriers in global bird conservation

1  
2  
3  
4  
5  
6  
7  
8  
9  
10  
11  
12  
13  
14  
15  
16  
17  
18  
19  
20  
21  
22  
23  
24  
25

**Authors:** Pablo Jose Negret<sup>1,2</sup>, Scott C. Atkinson<sup>3</sup>, Bradley K. Woodworth<sup>2, 4</sup>, Marina Corella Tor<sup>2, 4</sup>, James R. Allan<sup>5</sup>, Richard A. Fuller<sup>2, 4</sup>, Tatsuya Amano<sup>2, 4</sup>

<sup>1</sup>The University of Queensland, School of Earth and Environmental Sciences, Qld 4072, Australia

<sup>2</sup>The University of Queensland, Centre for Biodiversity and Conservation Science, Qld 4072, Australia

<sup>3</sup> United Nations Development Programme, New York, U.S.A.

<sup>4</sup> The University of Queensland, School of Biological Sciences, Qld 4072, Australia

<sup>5</sup> Institute for Biodiversity and Ecosystem Dynamics, University of Amsterdam, Amsterdam, The Netherlands.

26 **Abstract**

27

28 *Multiple languages being spoken within a species' distribution can impede communication*  
29 *among conservation stakeholders, the compilation of scientific information, and the development*  
30 *of effective conservation actions. Here, we investigate the number of official languages spoken*  
31 *within the distributions of 10,863 bird species to identify which ones might be particularly*  
32 *affected by consequences of language barriers. We show that 1587 species have 10 languages or*  
33 *more spoken within their distributions. Threatened, migratory and wide-ranging species have*  
34 *especially many languages spoken within their distribution. Particularly high numbers of species*  
35 *with many languages within their distribution are found in Eastern Europe, Russia and central*  
36 *and western Asia. Global conservation efforts would benefit from implementing guidelines to*  
37 *overcome language barriers, especially in regions with high species and language diversity.*

38

39

## 40 **Introduction**

41  
42 Earth's biodiversity is under threat. Human population growth and associated activities are  
43 causing the loss of natural ecosystems and species habitats at an unprecedented rate (1, 2), with  
44 at least one million species currently threatened with extinction (3). This accelerated loss of  
45 biodiversity and the fact that many species and threats extend beyond country borders has  
46 stimulated the generation of guidelines for effective transboundary collaboration on international  
47 agreements, such as the Convention on Biological Diversity and the Convention on Trade in  
48 Endangered Species of Wild Fauna and Flora (4, 5). However, existing guidelines for  
49 transboundary collaboration rarely consider differences in cultural backgrounds among countries,  
50 which can create both challenges and opportunities in conservation (4, 6, 7).

51  
52 An aspect of culture that has fundamental consequences for conservation is the variety of  
53 languages that people speak. Language differences across the distribution of a species can  
54 generate a number of challenges for conservation (summarized with examples in Table 1). First,  
55 multiple languages being spoken within the distribution of a species can create a barrier to the  
56 effective collection and compilation of scientific information relevant to conservation, which is  
57 often scattered across languages (6). For example, comprehensive ecological knowledge of  
58 understudied seasonal migratory birds in Brazil could only be achieved by combining  
59 information from Brazilian citizen science platforms available only in Portuguese with  
60 information from global, English-language, platforms (7). Second, language differences within  
61 the distribution of species can also impede effective agreements between stakeholders in  
62 conservation decisions. For example, differences in the use of vocabulary even within the same

63 language influenced the perception of the public on the importance of hedgehog eradication as a  
64 conservation measure in Scotland (9). Such an effect could be magnified further when  
65 stakeholders speak different languages. Third, language differences can affect the generation and  
66 quality of collaborative conservation projects. For example, overcoming language barriers was  
67 recognized as a fundamental step for the generation of effective conservation measures for  
68 threatened bird species in the Julian alps, the Bavarian-Bohemian Forest (10) and the  
69 Mediterranean sea (11).

70  
71 Several studies have assessed the relationships between species diversity and linguistic diversity  
72 at local (12) to global scales (13, 14). However, despite growing evidence of the conservation  
73 consequences of language differences within species distributions, it remains unknown where  
74 such negative consequences of language barriers might be expected, and for which species. Here  
75 we investigate the number of languages spoken within the distribution of each of 10,863 extant  
76 bird species and discuss the ramifications of this for conservation. We focus on birds because (i)  
77 many bird species migrate, with their distribution spanning multiple countries, (ii) a wealth of  
78 ecological knowledge, especially detailed information on distribution is available (15), and (iii) a  
79 large number of transboundary conservation projects already exist (16, 17). We specifically aim  
80 to identify species with many languages within their distribution, and regions with high richness  
81 of such species, where language barriers could impede conservation.

82

## 83 **Results**

84

85 On average, seven official languages are spoken within a species' distribution, 16 for migratory  
86 species and three for threatened species. Additionally, 75.6% of the 10,863 extant bird species,

87 93.6% of the migratory species, and 55.5% of the threatened (59% of vulnerable (VU), 52.5% of  
88 endangered (EN) and 47.9% of critically endangered (CR)) species have two or more official  
89 languages within their distributions (Fig. 1).

90  
91 There is a strong positive relationship between the number of languages spoken within each  
92 species' distribution and range size, and species with wide distributions have as many as 100  
93 official languages spoken within their distribution (Fig. 2, Table S2). When controlling for the  
94 range size effect, threatened (CR and EN) and migratory species have significantly more  
95 languages spoken within their distributions, compared to non-threatened (LC) and non-migratory  
96 species (Fig. 2, Table S2). For example, Critically Endangered species with many languages  
97 within their distribution include Balearic shearwater (*Puffinus mauretanicus*, 25 languages),  
98 sociable lapwing (*Vanellus gregarius*, 22 languages), and Rüppell's vulture (*Gyps rueppelli*, 20  
99 languages) (Fig. 2b). The results vary between taxonomic groups, with species in some orders,  
100 such as Strigiformes (owls) and Psittaciformes (including parrots, parakeets, lorikeets and  
101 macaws), having comparatively few official languages within their distribution (seven and three  
102 on average, respectively), with others, such as Ciconiiformes (including storks, herons, bitterns,  
103 ibises and spoonbills) and Charadriiformes (including waders, gulls and auks), having especially  
104 many languages (19 and 17 on average, respectively; Fig. 2c). The results were qualitatively the  
105 same based on the most spoken languages in each country (Fig. S3, Table S2).

106  
107 English, Spanish, French and Portuguese are the four languages associated with the most species;  
108 this pattern was consistent for all species, threatened species, and migratory species (Table S3,  
109 Fig. S4). Across all bird species, 45% have some area of their distribution associated with  
110 Spanish, 38% with English, 27% with Portuguese and 22% with French. For migratory species

111 67% were associated with English, 61% with Spanish, 42% with French and 38% with  
112 Portuguese. Finally, for threatened species, 23% were associated with Spanish, 16% with  
113 English, 16% with Portuguese and 12% with French (Table S3). However, 899 species  
114 associated with Spanish are not associated with any other languages and thus, when only species  
115 associated with two or more languages were assessed English was the language associated with  
116 the most species, for all species and for threatened species (Table S3). Geographically there is  
117 variation in the distribution of the species associated to the top six languages; In south America  
118 many species are associated with English, Spanish and Portuguese, in Africa with English,  
119 Kiswahili, Portuguese and French, and in Southeast Asia with Mandarin (Fig. 3; see  
120 [https://translatesciences.shinyapps.io/bird\\_language\\_diversity/](https://translatesciences.shinyapps.io/bird_language_diversity/) for other languages' results).

121  
122 Especially many species with high numbers of languages spoken within species distributions  
123 were found in central and southern Africa, India, southeast China, eastern Europe, and Russia  
124 (Fig. 4a). A large number of threatened species with high language richness were found in  
125 Western and Central Asia as well as southern Russia (Fig. 4b). A similar pattern was found for  
126 migratory species with eastern Europe also being a hotspot of species with high language  
127 richness (Fig. 4c). The results remained qualitatively the same when using the most spoken  
128 language, instead of official languages, in each country (Fig. S2, 3, 4 & 5).

129

## 130 **Discussion**

131

132 Language differences are increasingly recognized as a barrier to transboundary conservation, and  
133 several international projects have been developing guidelines on how to overcome this barrier  
134 (18, 19). As summarized in Table 1, language differences can have serious consequences for

135 conservation by, for example, posing barriers to the generation and transfer of scientific  
136 knowledge as well as the development of effective conservation activities and policies. Such  
137 negative consequences of language barriers are expected to be particularly severe in the  
138 conservation of species with multiple languages being spoken within their distribution. Our  
139 research provides important insights into where in the world and for which species  
140 conservationists are especially required to make extra efforts to overcome language barriers to  
141 improve bird conservation.

142  
143 Our results reveal that threatened (CR and EN) and migratory species have more languages  
144 spoken within their distribution, when controlling for range size (Table S2). Additionally, Our  
145 results show that 217 bird species have 50 languages or more spoken within their distributions  
146 (Table S4) and that more than two thirds of all species, half of the threatened and almost all  
147 migratory species are associated with two or more languages (Fig. 1). These results, together  
148 with the multiple ways that language barriers can affect conservation (Table 1), highlight the  
149 potentially serious consequences of language barriers in bird conservation, especially for  
150 migratory and threatened bird species. For example, the distribution of the common pochard  
151 (*Aythya ferina*), which is classified as Vulnerable by the IUCN, spans 108 countries in Europe,  
152 Russia, Asia, and north Africa, where a total of 75 official languages are spoken. This means that  
153 scientific information on this species (including peer-reviewed papers and grey literature) can be  
154 scattered across those different languages, and successful conservation of the species may  
155 depend on effective collaboration and policy agreements among people with diverse linguistic  
156 and cultural backgrounds. Species in the orders Ciconiiformes and Charadriiformes have an  
157 especially high number of languages spoken within their distributions. For example, the

158 Critically Endangered spoon-billed sandpiper (*Calidris pygmaea*) has nine different languages  
159 spoken within its distribution. For this species, educational kits with information about the  
160 species ecology and its conservation have already been translated to five different languages to  
161 improve the outreach of the conservation message ([https://www.eaaflyway.net/spoon-billed-  
162 sandpiper-teaching-kit-available-for-free-download/](https://www.eaaflyway.net/spoon-billed-sandpiper-teaching-kit-available-for-free-download/)), demonstrating the work required to  
163 address language barriers in conservation. The conservation of species associated with many  
164 languages will likely require such coordinated efforts among stakeholders with different cultural  
165 and linguistic backgrounds, for example through incorporating action plans to overcome  
166 language barriers in relevant policy agreements, such as those in the Convention on Migratory  
167 Species (20).

168  
169 Even though one third of the bird species globally have English spoken within a part of their  
170 distribution, other languages are also associated with a large number of species in certain  
171 regions, such as Spanish and Portuguese in South America, Kiswahili in Africa, and Mandarin in  
172 South East Asia. These languages could be key to conservation research, policies, and practices  
173 in those regions. For example, important information related to species ecology and conservation  
174 is often available in non-English languages (6), which is however usually omitted when  
175 conducting conservation research and generating conservation plans. The omission of such non-  
176 English-language information can bias inferences of ecological analysis (21), which in turn can  
177 cause suboptimal conservation decisions. Effective conservation of bird species would require  
178 synthesizing scientific information and transferring generated knowledge in these key languages,  
179 and our results provide practical information on which species would benefit from multilingual



180 assessments and which languages are key to those species (see Table S4 and Fig. 4, see  
181 [https://translatesciences.shinyapps.io/bird\\_language\\_diversity/](https://translatesciences.shinyapps.io/bird_language_diversity/) for other languages' results).

182  
183 Overcoming language barriers will play an important role in areas with a large number of species  
184 with many languages spoken within their distribution. These regions include central and southern  
185 Africa, India and Southeast Asia as well as Kazakhstan, southern Russia and Western Asia for  
186 threatened and migratory species. Challenges for bird conservation in these regions include a  
187 need to reconcile perspectives and interests among extremely diverse stakeholders, as species in  
188 these regions have, on average, up to 84 different languages spoken within their distributions.  
189 Establishing cross-national associations, such as the European Bird Census Council  
190 (<https://www.ebcc.info/>), in these regions would be an effective approach for coordinating  
191 monitoring and conservation efforts and achieving consensus decisions among countries. Other  
192 areas where species associated with particularly many languages are found are Europe, north  
193 Africa, western Asia and north Russia; again up to 84 languages, on average, are spoken within  
194 the distribution of species found in those regions. Although these regions did not show the  
195 highest richness of such species, this does not diminish the importance of proactively accounting  
196 for language barriers in conservation initiatives in these areas. For example, the United Nations  
197 Barcelona Convention has developed guidelines on conservation of Mediterranean seabirds that  
198 promote coordinated actions between countries with different language backgrounds. The  
199 Mediterranean Small Island Initiative also aims to facilitate collaborations between ten different  
200 countries in the region (17). Such initiatives would benefit from the creation of guidelines to  
201 overcome language barriers between the parties involved (11).

202

203 While our analysis is, to our knowledge, the most comprehensive assessment of the identity and  
204 number of languages spoken through the distribution of bird species globally, the way this  
205 association was measured has some caveats. The presence of a species on a particular country  
206 does not imply that all of the official languages spoken in that country are spoken within that  
207 species distribution. Additionally, the fact that multiple languages are spoken through the  
208 distribution of a species does not imply that all the scientific information is being generated in  
209 different languages through the species distribution. Education systems in many countries  
210 promote learning of multiple languages (including English) that are different from the official or  
211 most spoken one in the country (22) (23). Future research is needed to understand the ability of  
212 people to work across language barriers and how it varies geographically, and also to identify  
213 particular species with low compatibility between the languages spoken within their distribution,  
214 areas with an especially large number of such species, and languages that generate such  
215 incompatibility.

216

217 The global community has a joint responsibility to address the biodiversity crisis and avoid  
218 further species extinctions, which requires an effective transfer of knowledge and information  
219 between countries with diverse linguistic and cultural backgrounds. In Table 1 we identified four  
220 different pathways through which language barriers affect conservation: 1) scientific research, 2)  
221 policies, 3) conservation activities and 4) general public. Here we provide potential solutions to  
222 overcome such ramifications of language barriers in conservation. A way to improve the transfer  
223 of scientific research and to overcome language barriers when generating and executing  
224 conservation policies is to promote the multilingual transfer of relevant information, ideally  
225 through a clear, concise and easy-to-use translation protocol (24), especially for species with

226 many languages spoken within their distributions and in areas where those species are found.  
227 This can be done by, for example, providing translations of relevant scientific papers and policy  
228 documents in multiple, relevant languages. Using information sourced from multiple languages,  
229 especially languages associated with the species being assessed, and actively engaging with  
230 scientist and politicians with different language and cultural background would also increase the  
231 access to otherwise omitted information. This improves the quantity and quality of the  
232 knowledge on the ecology and conservation of the species, which in turn facilitates the  
233 generation and execution of more effective conservation policies. On the other hand, stimulating  
234 multilingual conservation activities, such as the ones implemented in the program “Birds without  
235 borders” (<https://www.birdlife.org/africa/projects/conservation-migratory-birds-cmb>), as well as  
236 promoting the translation of critical conservation information on target species into clear and  
237 brief documents for the general public would improve the success of conservation actions and  
238 the outreach of information on how to avoid the extinction of those species. Our analysis has  
239 shown species and areas with significant challenges of language barriers to conservation and we  
240 have provided some potential solutions for these challenges. To implement these solutions and  
241 overcome these barriers there is a need for political will, local support and sufficient resourcing  
242 (4, 6).

243

244

245 **Figures and Tables:**

246

247 **Table 1.** Potential challenges to conservation outcomes caused by language barriers

248

| Pathways                                                                                                             | Consequences of language barriers                                                                  | Examples                                                                                                                                                                                                                                                                                                          |
|----------------------------------------------------------------------------------------------------------------------|----------------------------------------------------------------------------------------------------|-------------------------------------------------------------------------------------------------------------------------------------------------------------------------------------------------------------------------------------------------------------------------------------------------------------------|
| <p><i>Scientific research</i></p>  | <p><i>Inaccessibility to scientific information (e.g., peer-reviewed papers and databases)</i></p> | <p>Thirty six percent of 75,513 scientific documents on biodiversity conservation published in 2014 were written in non-English languages (6).</p>                                                                                                                                                                |
|                                                                                                                      |                                                                                                    | <p>The majority of research on fengshui forests has been published in Chinese, and thus is not globally accessible (25).</p>                                                                                                                                                                                      |
|                                                                                                                      |                                                                                                    | <p>Research on China's Belt and Road Initiative is dominated by Chinese authors, writing predominately in Chinese (26).</p>                                                                                                                                                                                       |
|                                                                                                                      |                                                                                                    | <p>Combining information from Brazilian citizen science platforms available only in Portuguese with information from global, English-language, platforms improved the ecological knowledge of understudied seasonal migratory birds (8).</p>                                                                      |
|                                                                                                                      | <p><i>Barrier to developing effective collaboration</i></p>                                        | <p>Language disparities pose challenges to the development of international research and conservation of tropical forests and peatlands in Indonesia due to limited English language abilities within Indonesian institutions (27).</p>                                                                           |
|                                                                                                                      |                                                                                                    | <p>Language was identified as a major impediment to the development of international scientific collaborations by researchers in eight countries (28).</p>                                                                                                                                                        |
|                                                                                                                      |                                                                                                    | <p>Language differences pose a barrier to collaboration in cultural heritage conservation and management among countries of former Yugoslavia region, as not having a common language and lacking English language skills impede effective communication (29).</p>                                                |
|                                                                                                                      |                                                                                                    | <p>A review of 18 studies examining the impressions of supervisors of international higher degree students showed a perceived burden in supervising international students during placement, and language and cultural differences between international students and the workplace in the host country (30).</p> |

|                                                                                                                           |                                                                                                                                                                                                                          |                                                                                                                                                                                                                                                                                                                                                                                                                                                                                                                                                                                                                                                                                                                                                                                                               |
|---------------------------------------------------------------------------------------------------------------------------|--------------------------------------------------------------------------------------------------------------------------------------------------------------------------------------------------------------------------|---------------------------------------------------------------------------------------------------------------------------------------------------------------------------------------------------------------------------------------------------------------------------------------------------------------------------------------------------------------------------------------------------------------------------------------------------------------------------------------------------------------------------------------------------------------------------------------------------------------------------------------------------------------------------------------------------------------------------------------------------------------------------------------------------------------|
|                                                                                                                           | <p><i>Barrier to research dissemination (e.g., outreach and media coverage)</i></p>                                                                                                                                      | <p>Language was a barrier to research dissemination and networking during a collaborative experience in the UK, where culturally diverse participants interpreted specific concepts and ideas according to their own context (31).</p> <p>Dissemination of information on agroforestry innovations was impeded due to language barriers in Sulawesi, Indonesia, as most farmers only speak local languages (32).</p> <p>Language and cultural differences pose a barrier to the dissemination of indigenous knowledge in the form of storytelling (33).</p> <p>Having English as the “International Language of Science” allows for the access of global scientific literature but creates a linguistic barrier for non-native English speakers, who are left out when disseminating their research (34).</p> |
| <p><b>Policies</b></p>                   | <p><i>Inaccessibility to policy documents</i></p> <p><i>Barrier to effective policy agreements among countries (e.g., bilateral agreements)</i></p> <p><i>Language barriers between scientists and policy makers</i></p> | <p>One third of the management plans identified for an assessment of strategic planning, zoning, impact monitoring, and tourism management at Natural World Heritage Sites were excluded from the analysis due to language barriers (19).</p> <p>Having a common official language between countries with established policy agreements had a statistically significant effect on reducing the tonnage of waste shipments (35)</p> <p>Language disparities can lead to poor communication between scientists and policy-makers (36).</p> <p>Time available to read papers, difficulty in understanding technical language and reading in English have been recognized as a barrier to access scientific literature for Brazilian policy makers (37).</p>                                                      |
| <p><b>Conservation activities</b></p>  | <p><i>Barrier to developing collaborative actions</i></p>                                                                                                                                                                | <p>Language barriers impede collaborative conservation activities between countries in the Mediterranean (11).</p> <p>Differences in language represent a challenge for decision-making leading to agreements on multi-year resource allocation at National Parks in two transboundary regions in Europe, Italian-Slovenian and German-Czech borders (10).</p>                                                                                                                                                                                                                                                                                                                                                                                                                                                |

|                                                                                                                |                                                                                                             |                                                                                                                                                                                                                                                                                                                                                                                                                                                                                                                                                                                                                                                                                                                          |
|----------------------------------------------------------------------------------------------------------------|-------------------------------------------------------------------------------------------------------------|--------------------------------------------------------------------------------------------------------------------------------------------------------------------------------------------------------------------------------------------------------------------------------------------------------------------------------------------------------------------------------------------------------------------------------------------------------------------------------------------------------------------------------------------------------------------------------------------------------------------------------------------------------------------------------------------------------------------------|
|                                                                                                                | <p><i>Extra costs (time/finance) for the multi-lingualisation of materials (websites, leaflets etc)</i></p> | <p>Educational kits with information about the ecology and conservation of Critically Endangered spoon-billed sandpipers were translated to five different languages to improve the outreach of the conservation message (<a href="https://www.eaaflyway.net/spoon-billed-sandpiper-teaching-kit-available-for-free-download/">https://www.eaaflyway.net/spoon-billed-sandpiper-teaching-kit-available-for-free-download/</a>).</p>                                                                                                                                                                                                                                                                                      |
|                                                                                                                | <p><i>Inaccessibility to relevant information</i></p>                                                       | <p>Strategies to overcome language barriers in a collaborative decision analysis in two transboundary conservation regions in Europe included hiring multilingual staff (10).</p> <p>Differences in language in National Park planning documents represented a challenge for collaborative approaches for decision-makers in two transboundary conservation regions in Europe (10).</p> <p>The dissemination of indigenous ecological knowledge and established conservation strategies in Australia is hindered by the fact that indigenous ranger groups, especially those in remote regions, who often do not speak English as their first language, are forced to adopt non-Indigenous forms of monitoring (38).</p> |
| <p><b>General public</b></p>  | <p><i>Difference in awareness due to cultural differences</i></p>                                           | <p>Local culture (a broad-scale consumption of the species) represents a major threat to yellow-breasted bunting, causing a population collapse of the species (39).</p> <p>Use of indigenous ecological knowledge for contemporary land management has been limited by language barriers and cross-cultural awareness in Australia (38).</p>                                                                                                                                                                                                                                                                                                                                                                            |

249

250

251  
252  
253  
254  
255  
256  
257  
258  
259  
260  
261  
262  
263  
264  
265  
266  
267  
268  
269  
270  
271  
272  
273

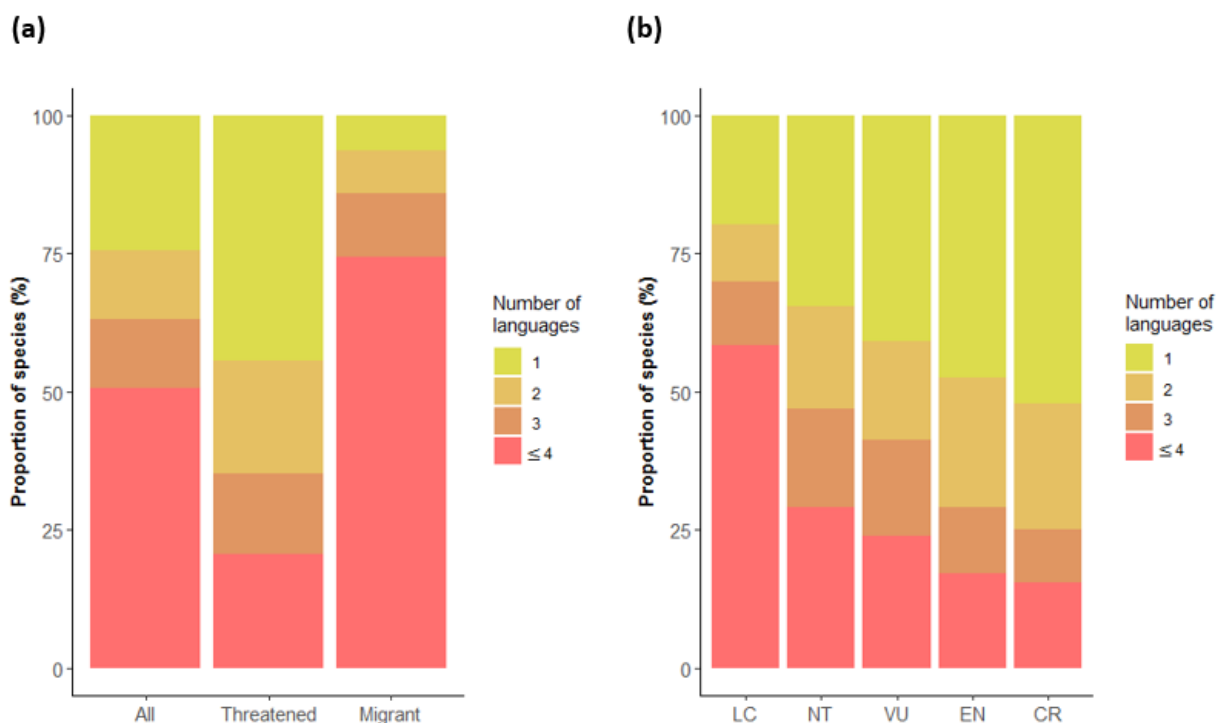

**Figure 1.** Language diversity among birds. **(a)** Number of official languages within the distributions of all bird species (n=10,863), threatened species (n=1427) and migratory species (n=1939). **(b)** Number of official languages spoken in the distributions of bird species by threat category (as assessed by the International Union for Conservation of Nature). See Figure S2 for data on the most spoken language in each country.

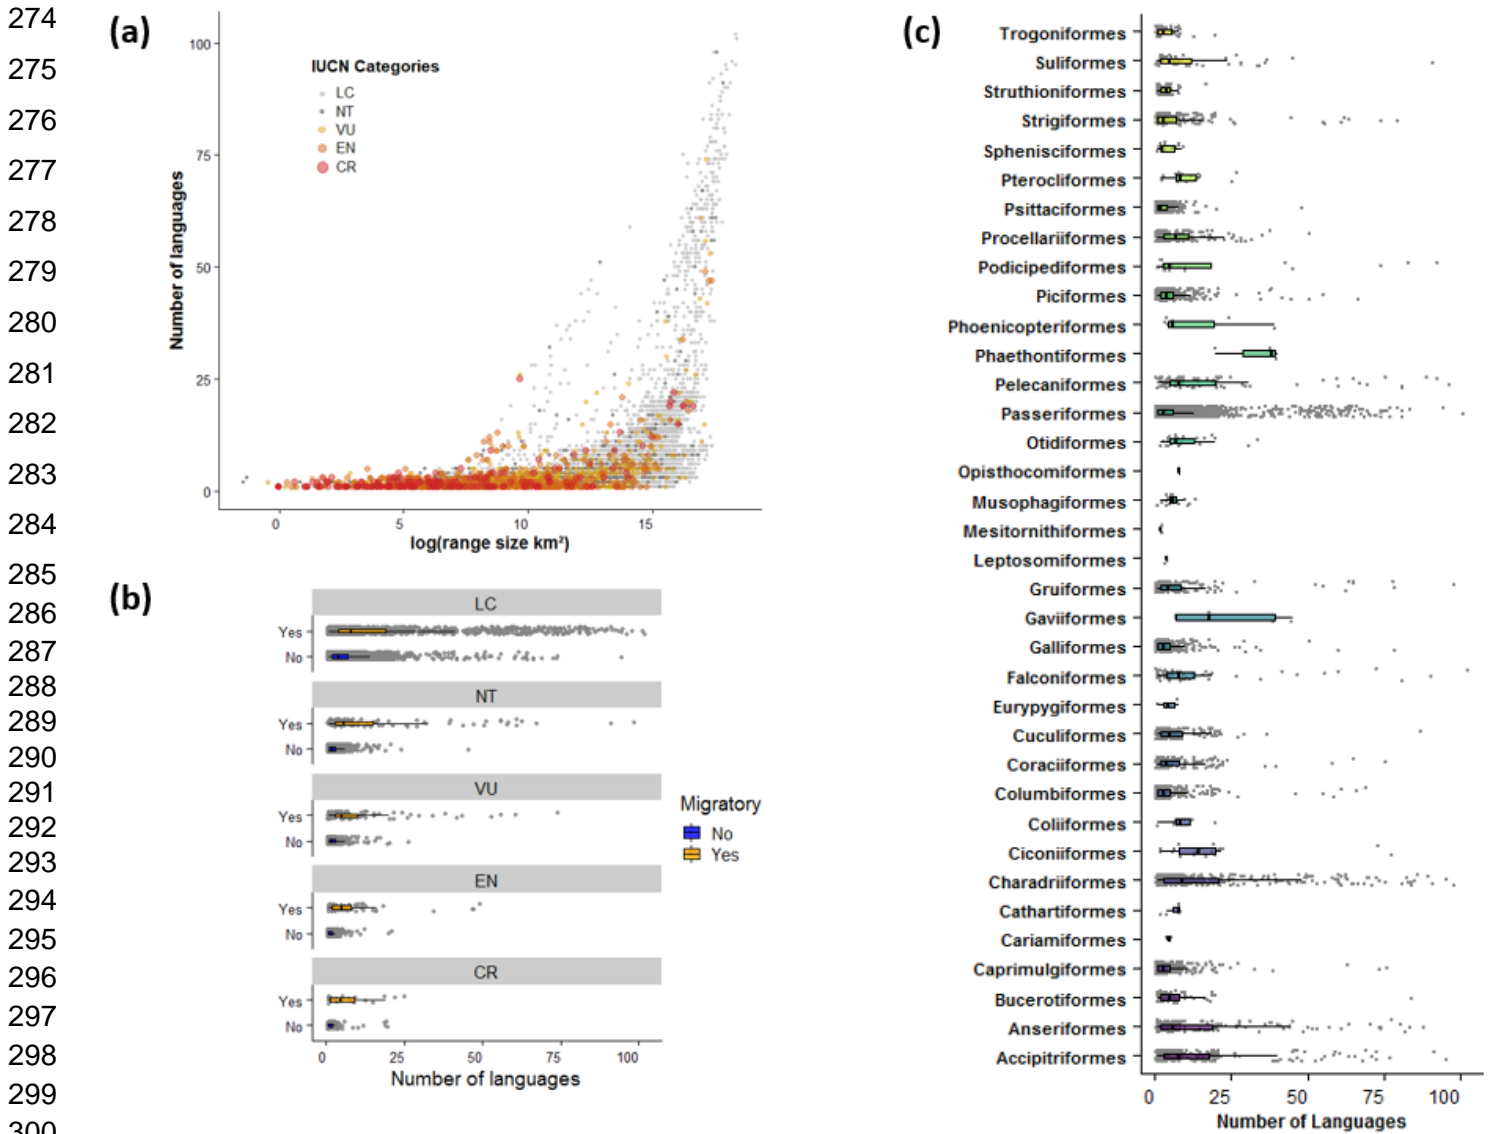

301 **Figure 2.** (a) Relationship between bird species' distribution range size and the number of official  
302 languages within their distribution. International Union for Conservation of Nature (IUCN) threat  
303 categories are shown in different colours. Number of official languages spoken within each species'  
304 distribution by (b) migratory status and IUCN threat categories, and by (c) taxonomic order. See Figure  
305 S3 for the same figure but based on the most spoken language in each country.  
306



307  
308  
309  
310  
311  
312  
313  
314  
315  
316  
317  
318  
319  
320  
321  
322  
323  
324  
325  
326  
327  
328  
329  
330  
331

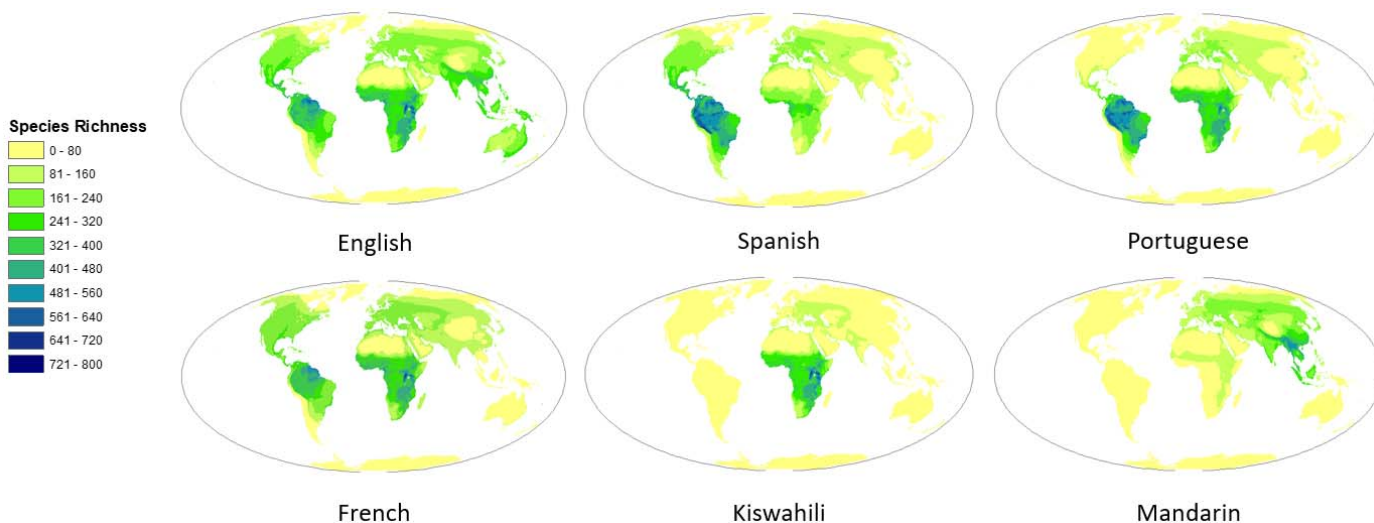

**Figure 3.** Species richness of birds associated with each of the top six official languages with the highest number of species. See [https://translatesciences.shinyapps.io/bird\\_language\\_diversity/](https://translatesciences.shinyapps.io/bird_language_diversity/) for other languages' results.

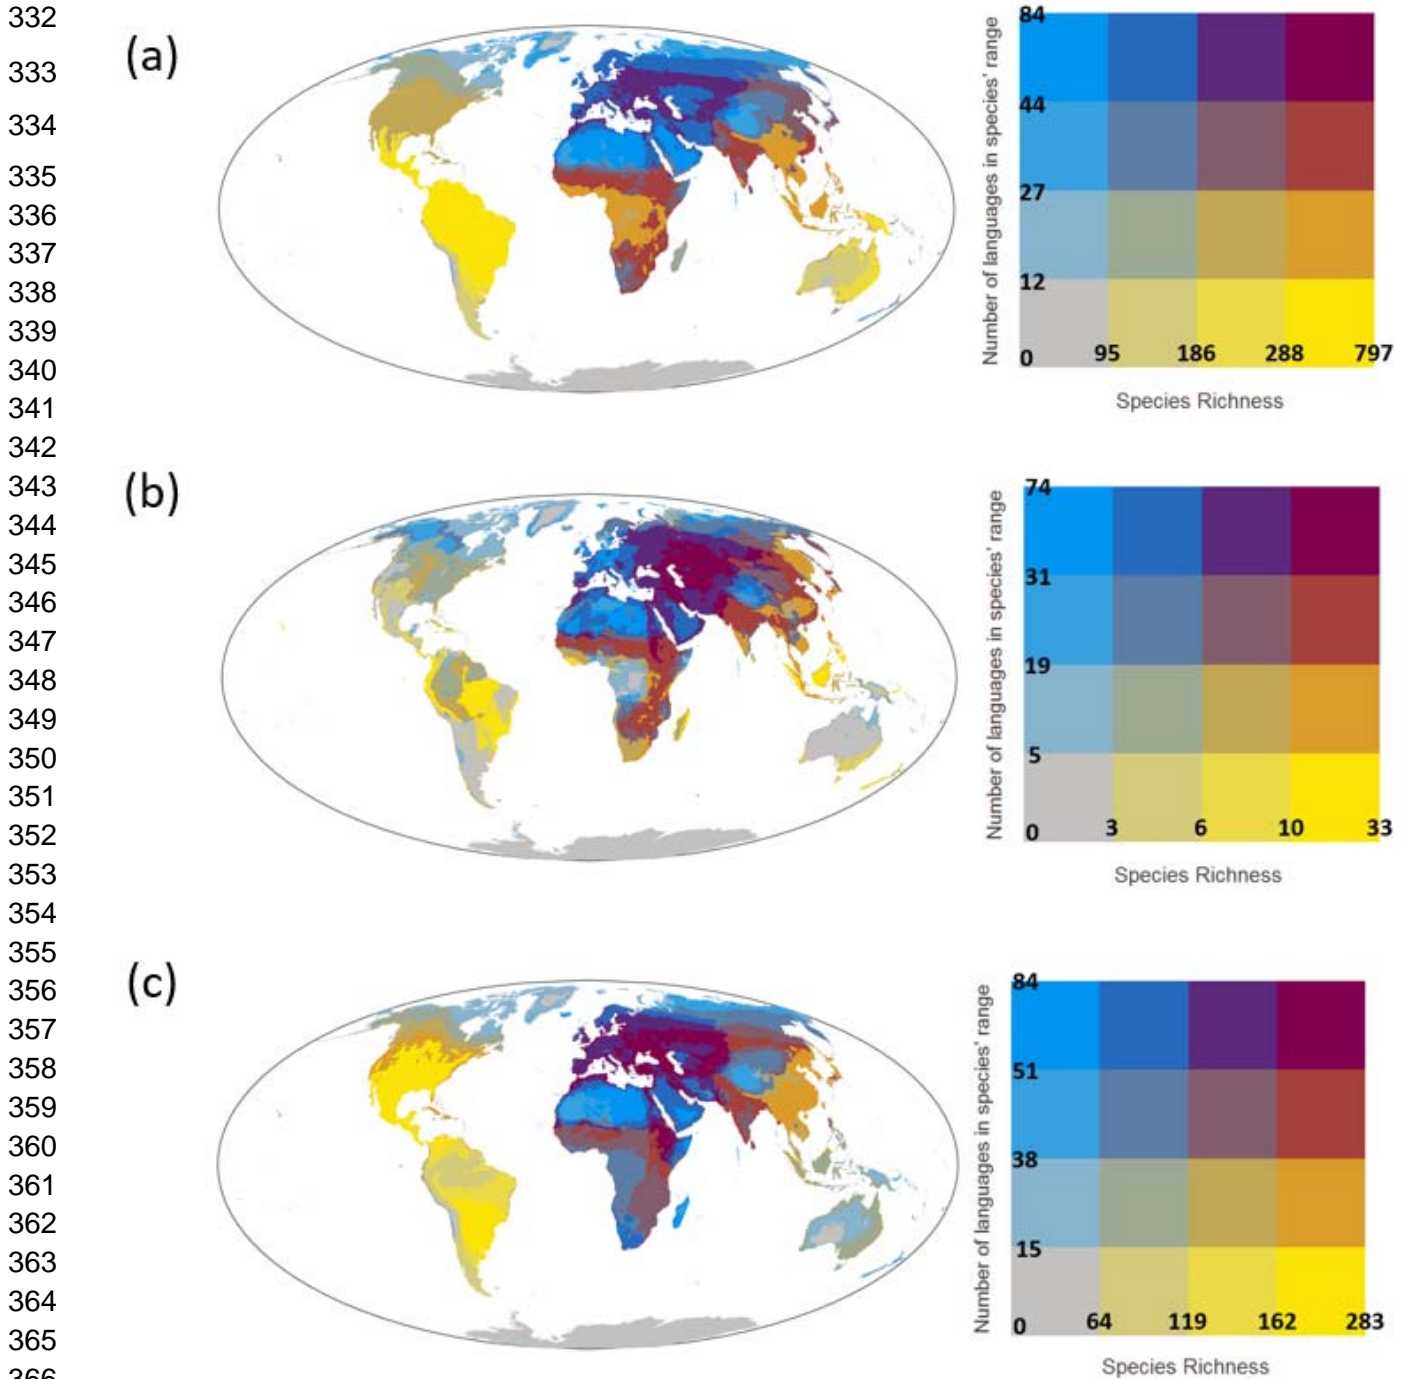

368 **Figure 4.** Bivariate maps showing the number of species (species richness) and the mean number of  
369 languages within the distribution of species found within each 30km × 30km grid cell for (a) all bird  
370 species, (b) threatened bird species, and (c) migratory bird species. The number of languages within each  
371 species' distribution was calculated using the official languages in each country. See Figure S5 for the  
372 same figure but using the dataset of the most spoken language in each country.

373

## 374 References

- 375  
376 1. J. R. Allan *et al.*, Hotspots of human impact on threatened terrestrial vertebrates. *PLoS Biol.* **17**,  
377 e3000158 (2019).
- 378 2. G. Ceballos, A. García, P. R. Ehrlich, The sixth extinction crisis loss of animal populations and  
379 species. *J. Cosmol.* **8**, 1821–1831 (2010).
- 380 3. United Nations, “Intergovernmental Science-Policy Platform on Biodiversity and Ecosystem  
381 Services (IPBES)” (2019), , doi:/10.1016/j.gloenvcha.2014.04.002.
- 382 4. S. Kark *et al.*, Cross-boundary collaboration: Key to the conservation puzzle. *Curr. Opin. Environ.*  
383 *Sustain.* **12**, 12–24 (2015).
- 384 5. N. Mason, M. Ward, J. E. M. Watson, O. Venter, R. K. Runting, Global opportunities and  
385 challenges for transboundary conservation. *Nat. Ecol. Evol.* **4**, 694–701 (2020).
- 386 6. T. Amano, J. P. González-Varo, W. J. Sutherland, Languages Are Still a Major Barrier to Global  
387 Science. *PLoS Biol.* **14**, e2000933 (2016).
- 388 7. J. R. Allan *et al.*, Navigating the complexities of coordinated conservation along the river Nile.  
389 *Sci. Adv.* **5**, 1–12 (2019).
- 390 8. S. C. Schubert, L. T. Manica, A. D. C. Guaraldo, Revealing the potential of a huge citizen-science  
391 platform to study bird migration. *Emu.* **119**, 364–373 (2019).
- 392 9. T. J. Webb, D. Raffaelli, Conversations in conservation: Revealing and dealing with language  
393 differences in environmental conflicts. *J. Appl. Ecol.* **45**, 1198–1204 (2008).
- 394 10. B. J. Mattsson *et al.*, Evaluating a collaborative decision-analytic approach to inform conservation  
395 decision-making in transboundary regions. *Land use policy.* **83**, 282–296 (2019).
- 396 11. T. Mazor, Conservation and collaboration in the Mediterranean Sea. *Decision Point.* **73**, 8–9  
397 (2013).
- 398 12. S. T. Turvey, N. Pettorelli, Spatial congruence in language and species richness but not threat in  
399 the world’s top linguistic hotspot. *Proc. R. Soc. B Biol. Sci.* **281** (2014),  
400 doi:10.1098/rspb.2014.1644.
- 401 13. J. Loh, D. Harmon, *Biocultural Diversity: threatened species, endangered languages* (WWF,  
402 Amsterdam, Netherlands, 2014);  
403 [http://wwf.panda.org/wwf\\_news/press\\_releases/?222890/Biocultural-Diversity-Threatened-](http://wwf.panda.org/wwf_news/press_releases/?222890/Biocultural-Diversity-Threatened-Species-Endangered-Languages)  
404 [Species-Endangered-Languages](http://wwf.panda.org/wwf_news/press_releases/?222890/Biocultural-Diversity-Threatened-Species-Endangered-Languages)).
- 405 14. X. Hua, S. J. Greenhill, M. Cardillo, H. Schneemann, L. Bromham, The ecological drivers of  
406 variation in global language diversity. *Nat. Commun.* **10**, 1–10 (2019).
- 407 15. BirdLife International and NatureServe, Bird species distribution maps of the world (2020),  
408 (available at <http://www.birdlife.org/>).
- 409 16. BirdLife International, “State of the World’s Birds: taking the pulse of the planet” (Cambridge,  
410 UK, 2018), (available at <https://www.birdlife.org/sowb2018>).
- 411 17. P. Yésou, N. Baccetti, J. Sultana, *Ecology and Conservation of Mediterranean Seabirds and Other*  
412 *Bird Species under the Barcelona Convention. Update & Progress* (2011).
- 413 18. G. H. Copp *et al.*, Speaking their language – Development of a multilingual decision-support tool  
414 for communicating invasive species risks to decision makers and stakeholders. *Environ. Model.*  
415 *Softw.* **135** (2021), doi:10.1016/j.envsoft.2020.104900.
- 416 19. H. Job, S. Becken, B. Lane, Protected Areas in a neoliberal world and the role of tourism in  
417 supporting conservation and sustainable development: an assessment of strategic planning, zoning,  
418 impact monitoring, and tourism management at natural World Heritage Sites. *J. Sustain. Tour.* **25**,  
419 1697–1718 (2017).
- 420 20. United Nations Environmental Programme, Convention on the Conservation of Migratory Species  
421 of Wild Animals (2020), (available at <https://www.cms.int/>).
- 422 21. K. Konno *et al.*, Ignoring non-English-language studies may bias ecological meta-analyses. *Ecol.*  
423 *Evol.* **10**, 6373–6384 (2020).

- 424 22. Council of Europe, *Common European Framework of Reference for Languages: Learning,*  
425 *teaching, assessment* (Cambridge University Press, 2001;  
426 <http://assets.cambridge.org/052180/3136/sample/0521803136ws.pdf>).
- 427 23. T. Reagan, The promotion of linguistic diversity in multilingual settings: Policy and reality in  
428 post-apartheid south africa. *Lang. Probl. Lang. Plan.* **25**, 51–72 (2001).
- 429 24. H. Cheung, L. Mazerolle, H. P. Possingham, K. P. Tam, D. Biggs, A methodological guide for  
430 translating study instruments in cross-cultural research: Adapting the ‘connectedness to nature’  
431 scale into Chinese. *Methods Ecol. Evol.* **11**, 1379–1387 (2020).
- 432 25. B. Chen, C. Coggins, J. Minor, Y. Zhang, Fengshui forests and village landscapes in China:  
433 Geographic extent, socioecological significance, and conservation prospects. *Urban For. Urban*  
434 *Green.* **31**, 79–92 (2018).
- 435 26. H. C. Teo, A. Campos-Arceiz, B. V. Li, M. Wu, A. M. Lechner, Building a green Belt and Road:  
436 A systematic review and comparative assessment of the Chinese and English-language literature.  
437 *PLoS One.* **15** (2020), doi:10.1371/journal.pone.0239009.
- 438 27. M. E. Harrison *et al.*, Tropical forest and peatland conservation in Indonesia: Challenges and  
439 directions. *People Nat.* **2**, 4–28 (2020).
- 440 28. K. R. W. Matthews, E. Yang, S. W. Lewis, B. R. Vaidyanathan, M. Gorman, International  
441 scientific collaborative activities and barriers to them in eight societies. *Account. Res.* **27**, 477–495  
442 (2020).
- 443 29. H. Hirszenberger, J. Ranogajec, S. Vucetic, B. Lalic, D. Gracanin, Collaborative projects in cultural  
444 heritage conservation – management challenges and risks. *J. Cult. Herit.* **37**, 215–224 (2019).
- 445 30. D. C. A. Lee, T. P. Haines, S. Maneephong, Q. Zeng, Barriers to fieldwork placements for  
446 international higher degree students: A systematic literature review. *Aust. J. Career Dev.* **28**, 197–  
447 211 (2019).
- 448 31. H. Macpherson *et al.*, Collaborative community research dissemination and networking:  
449 Experiences and challenges. *Gateways Int. J. Community Res. Engagem.* **10** (2017),  
450 doi:10.5130/ijcre.v10i1.5436.
- 451 32. E. Martini, J. M. Roshetko, E. Paramita, Can farmer-to-farmer communication boost the  
452 dissemination of agroforestry innovations? A case study from Sulawesi, Indonesia. *Agrofor. Syst.*  
453 **91**, 811–824 (2017).
- 454 33. Á. Fernández-Llamazares, M. Cabeza, Rediscovering the Potential of Indigenous Storytelling for  
455 Conservation Practice. *Conserv. Lett.* **11**, 1–12 (2018).
- 456 34. M. C. Márquez, A. M. Porrás, Science Communication in Multiple Languages Is Critical to Its  
457 Effectiveness. *Front. Commun.* **5** (2020), doi:10.3389/fcomm.2020.00031.
- 458 35. D. Kellenberg, A. Levinson, “Waste of effort? international environmental agreements”  
459 (Cambridge, 2013).
- 460 36. D. C. Rose *et al.*, The major barriers to evidence-informed conservation policy and possible  
461 solutions. *Conserv. Lett.* **11**, 1–12 (2018).
- 462 37. M. Karam-Gemael, R. Loyola, J. Penha, T. Izzo, Poor alignment of priorities between scientists  
463 and policymakers highlights the need for evidence-informed conservation in Brazil. *Perspect.*  
464 *Ecol. Conserv.* **16**, 125–132 (2018).
- 465 38. E. J. Ens, G. M. Towler, C. Daniels, Looking back to move forward: Collaborative ecological  
466 monitoring in remote Arnhem Land. *Ecol. Manag. Restor.* **13**, 26–35 (2012).
- 467 39. J. Kamp *et al.*, Global population collapse in a superabundant migratory bird and illegal trapping  
468 in China. *Conserv. Biol.* **29**, 1684–1694 (2015).
- 469

470 **Acknowledgments:**

471 We are grateful to H. P. Possingham, D. Biggs, L. Sonter, and the Fuller lab group for providing  
472 constructive feedback and discussions around elements of this study. **Author contributions:**  
473 T.A. and P.J.N. designed the research. P.J.N. performed the analysis with help from S.C.A and  
474 T.A. the Shiny app was developed by B.K.W. The manuscript was written by P.J.N with help  
475 from S.C.A., B.K.W., M.C., J.R.A., R.A.F., and J.E.W.

476

477

478 **Data Availability**

479 Supplementary Table 1,3 & 4 will be made available upon request, previous to its deposition in  
480 an open-access repository with the peer-reviewed version of this study. Requests should be sent  
481 to the corresponding author.

482

483 **Supplementary information**

484

485 **Materials and Methods**

486

487 ***Bird species data***

488

489 We obtained species distribution maps for the birds of the world from Birdlife International and  
490 Nature Serve (1). We considered parts of each species distribution coded as “extant” for presence  
491 and “native” and “reintroduced” for origin. In the case of migratory species, all seasonal sections  
492 of the distribution were considered. Additionally, we obtained information on taxonomic  
493 classification, threat status and type of migratory characteristics for each species from Birdlife  
494 (1). Species were divided by conservation status [i.e., threatened (VU, EN and CR) and not  
495 threatened (LC and NT)] and migratory status [(i.e., Full migrants or not (the latter comprising  
496 non-migratory, altitudinal migrants and nomadic species)], and results were aggregated for these  
497 groups and for each bird species. The area of each species range distribution was calculated (in  
498 km<sup>2</sup>) Using PostGIS version 3.0.2 (2).

499

500 ***Data on languages of the world***

501

502 We compiled information on the official and most spoken languages of each country of the  
503 world. Official languages are the ones used by a country or jurisdiction for governmental and  
504 legal purposes while the most spoken language is the one that the largest proportion of the  
505 population of a country or jurisdiction speak. We used the World Fact Book from the United  
506 States Central Intelligence Agency (3) as a primary source, but additional sources were used as

507 needed (see Table S1). For the official languages we listed all the languages that each country  
508 states as official. Spain (five official languages), Ethiopia (five) and South Africa (11) were the  
509 only countries with more than four official languages so for those countries the top four official  
510 languages with the highest number of speakers were used. For disputed regions with official  
511 information available, such as Kashmir, the most commonly spoken languages in the region were  
512 used. This information was gathered from additional sources (Table S1). For Antarctica no  
513 official language was assigned. We also used the World Fact Book to identify the most spoken  
514 language in each country or jurisdiction. If this information was not available, the language  
515 recorded as “lingua franca” in the World Fact Book was selected. For Antarctica and Kashmir no  
516 language was assigned as most spoken.

517

#### 518 *Calculation of number of languages in species distribution and bird species richness*

519

520 First, we determined the identity of the countries each species distribution overlaps with and the  
521 official and most spoken languages of those countries. Those languages were assigned to each  
522 species. Then we estimated bird species richness using a global 30 km × 30 km grid. This has  
523 been identified as an optimal resolution for reducing the effects of commission errors (where  
524 species are thought to be present but are not) when working with global species distribution  
525 maps (4). Grid cells that straddle more than one country were split through the country borders  
526 into sub-units for each country. The number (i.e., species richness) and identity of the species  
527 present in each grid cell was determined.

528

#### 529 *Mapping areas of high numbers of bird species with many languages within their distribution*

530

531 Finally, by using the identity of the species present in each grid cell and the information on the  
532 number of languages spoken in the distribution of each species, we calculated the mean number  
533 of languages spoken in the distributions of the species present in each grid cell (Fig. S1). Using  
534 this information, we were able to identify areas in the world with high numbers of bird species  
535 with many languages within their distribution. Spatial data were analyzed in a Mollweide equal  
536 area projection in ESRI ArcGIS version 10.4 (5) and PostGIS version 3.0.2 (2), and statistics  
537 were calculated in R statistical language version 3.5.1 (6).

538

### 539 *Statistical analysis*

540

541 To investigate factors explaining the number of languages spoken within each species'  
542 distribution, we performed generalized linear mixed models (GLMMs) assuming a negative  
543 binomial distribution with the number of (either official or most spoken) languages spoken  
544 within each species' distribution as the response variable,  $\log_{10}$ -transformed distribution range  
545 size (km<sup>2</sup>), migratory status (non-migrant as the reference category), and conservation status  
546 (Least Concern (LC) as the reference category) as the explanatory variables, and the order of  
547 each species as a random factor. The GLMMs were implemented using the package lme4 in R  
548 (7).

549

550



551 **Table S1,3 & 4 are in excel format**

552 **Table S1.** List of official and most spoken languages for each country in the world.

553 **Table S3.** Number of bird species (n= 10863) associated with each of the official and most  
554 spoken languages of each country in the world.

555 **Table S4.** Number of official and most spoken languages associated with each bird species  
556 assessed (n=10863).

557

558  
559  
560  
561  
562  
563  
564  
565  
566  
567  
568  
569  
570  
571  
572  
573  
574  
575  
576  
577  
578  
579  
580

| Predictor            | Official languages |            |         |                  | Most Spoken languages |            |         |                  |
|----------------------|--------------------|------------|---------|------------------|-----------------------|------------|---------|------------------|
|                      | Estimate           | Std. error | Z-value | p                | Estimate              | Std. error | Z-value | p                |
| Intercept            | -2.26              | 0.07       | -30.49  | <b>&lt;0.001</b> | -3.42                 | 0.09       | -37.37  | <b>&lt;0.001</b> |
| <i>Coefficients</i>  |                    |            |         |                  |                       |            |         |                  |
| Log10(Area)          | 0.67               | 0.01       | 78.15   | <b>&lt;0.001</b> | 0.82                  | 0.01       | 82.3    | <b>&lt;0.001</b> |
| Migrant              | 0.31               | 0.02       | 15.4    | <b>&lt;0.001</b> | 0.22                  | 0.02       | 9.92    | <b>&lt;0.001</b> |
| Threat category (CR) | 0.32               | 0.07       | 4.35    | <b>&lt;0.001</b> | 0.41                  | 0.09       | 4.82    | <b>&lt;0.001</b> |
| Threat category (DD) | 0.28               | 0.13       | 2.24    | <b>0.03</b>      | 0.22                  | 0.15       | 1.52    | 0.13             |
| Threat category (EN) | 0.12               | 0.05       | 2.61    | <b>0.01</b>      | 0.17                  | 0.05       | 3.06    | <b>0.002</b>     |
| Threat category (NT) | 0.02               | 0.03       | 0.84    | 0.4              | 0.01                  | 0.03       | 0.19    | 0.85             |
| Threat category (VU) | 0.03               | 0.03       | 0.82    | 0.41             | 0.01                  | 0.04       | 0.13    | 0.89             |

**Table S2.** Results of negative binomial generalized linear mixed models (GLMM) to explain the number of (official or most spoken) languages spoken within bird species distribution (the response variable) using the three explanatory variables: log<sub>10</sub>-transformed distribution range size (km<sup>2</sup>), migratory status (non-migrant as the reference category), and IUCN threat categories (Least Concern as the reference category). The order of each species was also incorporated in the models as a random factor. Statistically significant p-values (p < 0.05) are indicated in bold.

581  
582  
583  
584  
585  
586  
587  
588  
589  
590  
591  
592  
593  
594  
595  
596  
597  
598  
599  
600  
601  
602  
603  
604  
605  
606  
607  
608  
609  
610  
611  
612

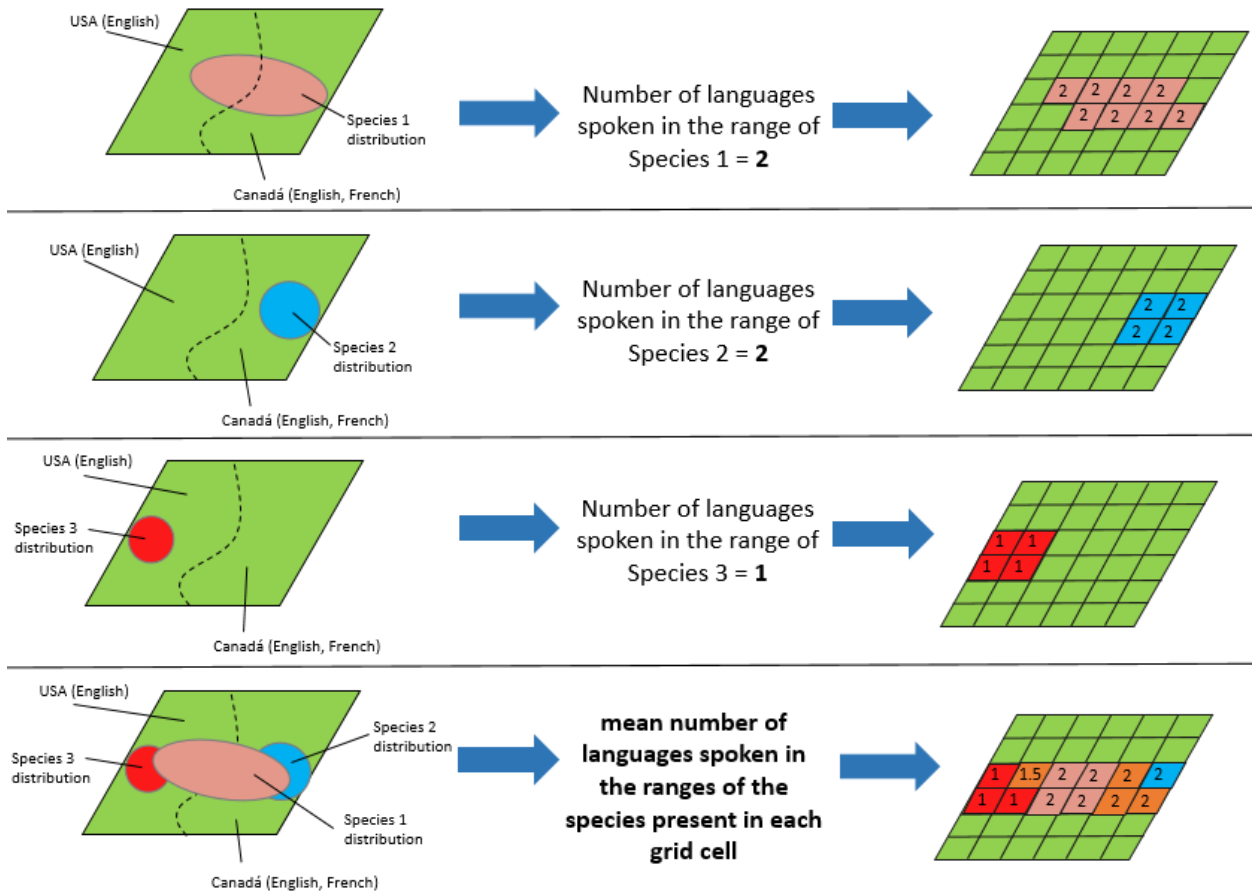

**Figure S1.** Methodological framework for mapping mean linguistic diversity across all species within each grid cell

613

614

615

616

617

618

619

620

621

622

623

624

625

626

627

628

629

630

631

632

633

634

635

636

637

638

639

640

641

642

643

644

645

646

647

648

649

650

651

652

653

654

655

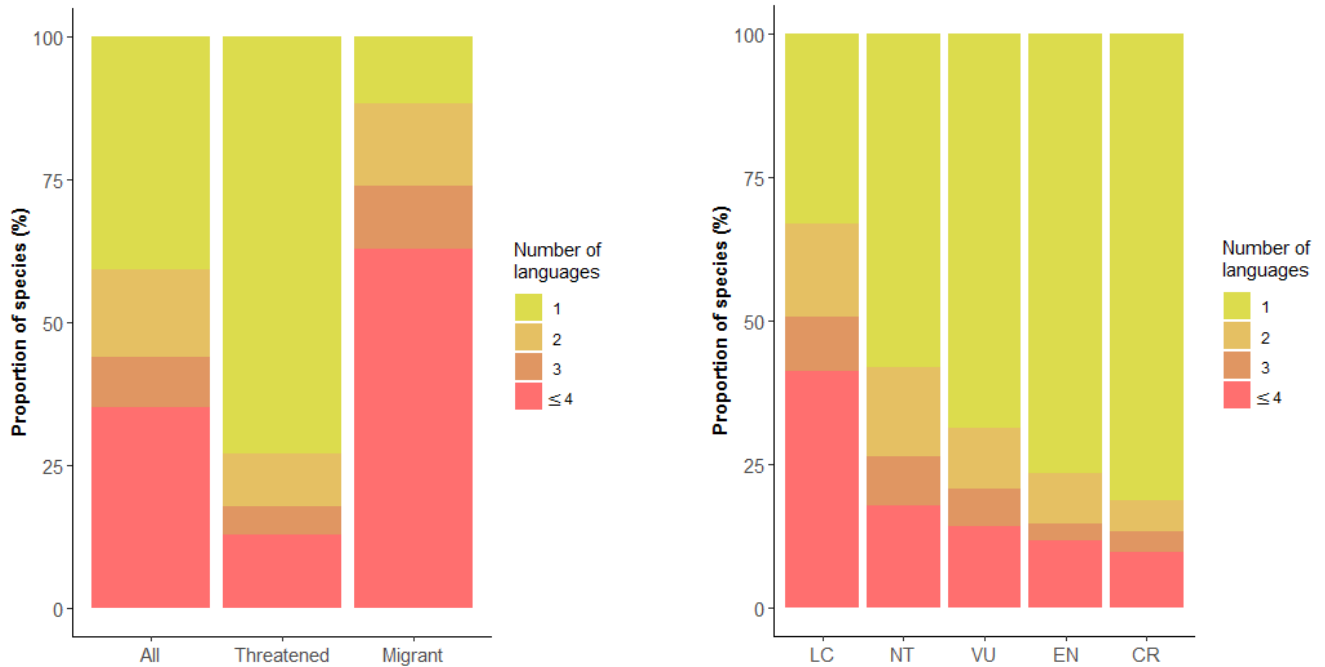

**Figure S2.** Language diversity among birds. **(a)** Number of most spoken languages within the distributions of all bird species (n=10,863), threatened species (n=1427) and migratory species (n=1939). **(b)** Number of most spoken languages spoken in the distributions of bird species by threat category (as assessed by the International Union for Conservation of Nature).

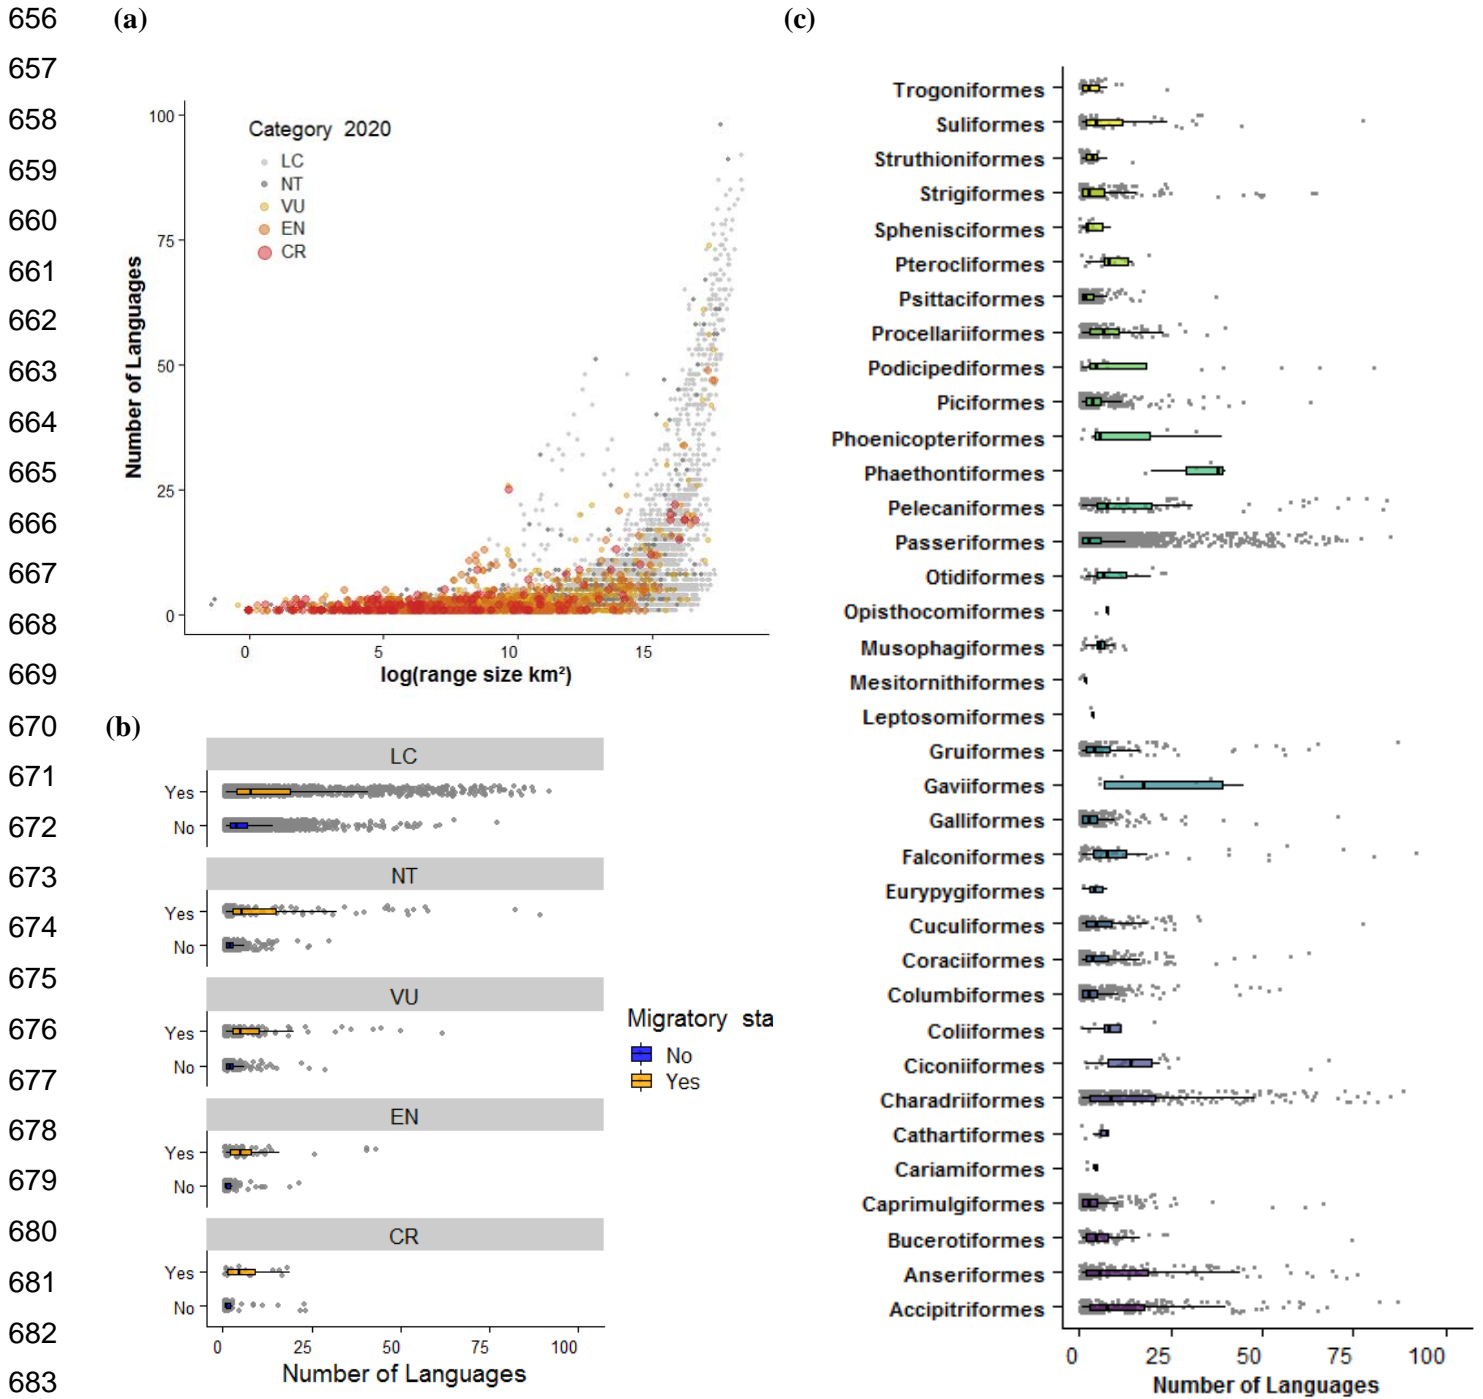

685 **Figure S3.** (a) Relationship between bird species' distribution range size and the number of languages  
 686 within their distribution. International Union for Conservation of Nature (IUCN) threat categories are  
 687 shown in different colours. Number of languages spoken within each species' distribution by (b)  
 688 migratory status and IUCN threat categories, and by (c) taxonomic order. This analysis was done using  
 689 the dataset of most spoken language in each country.

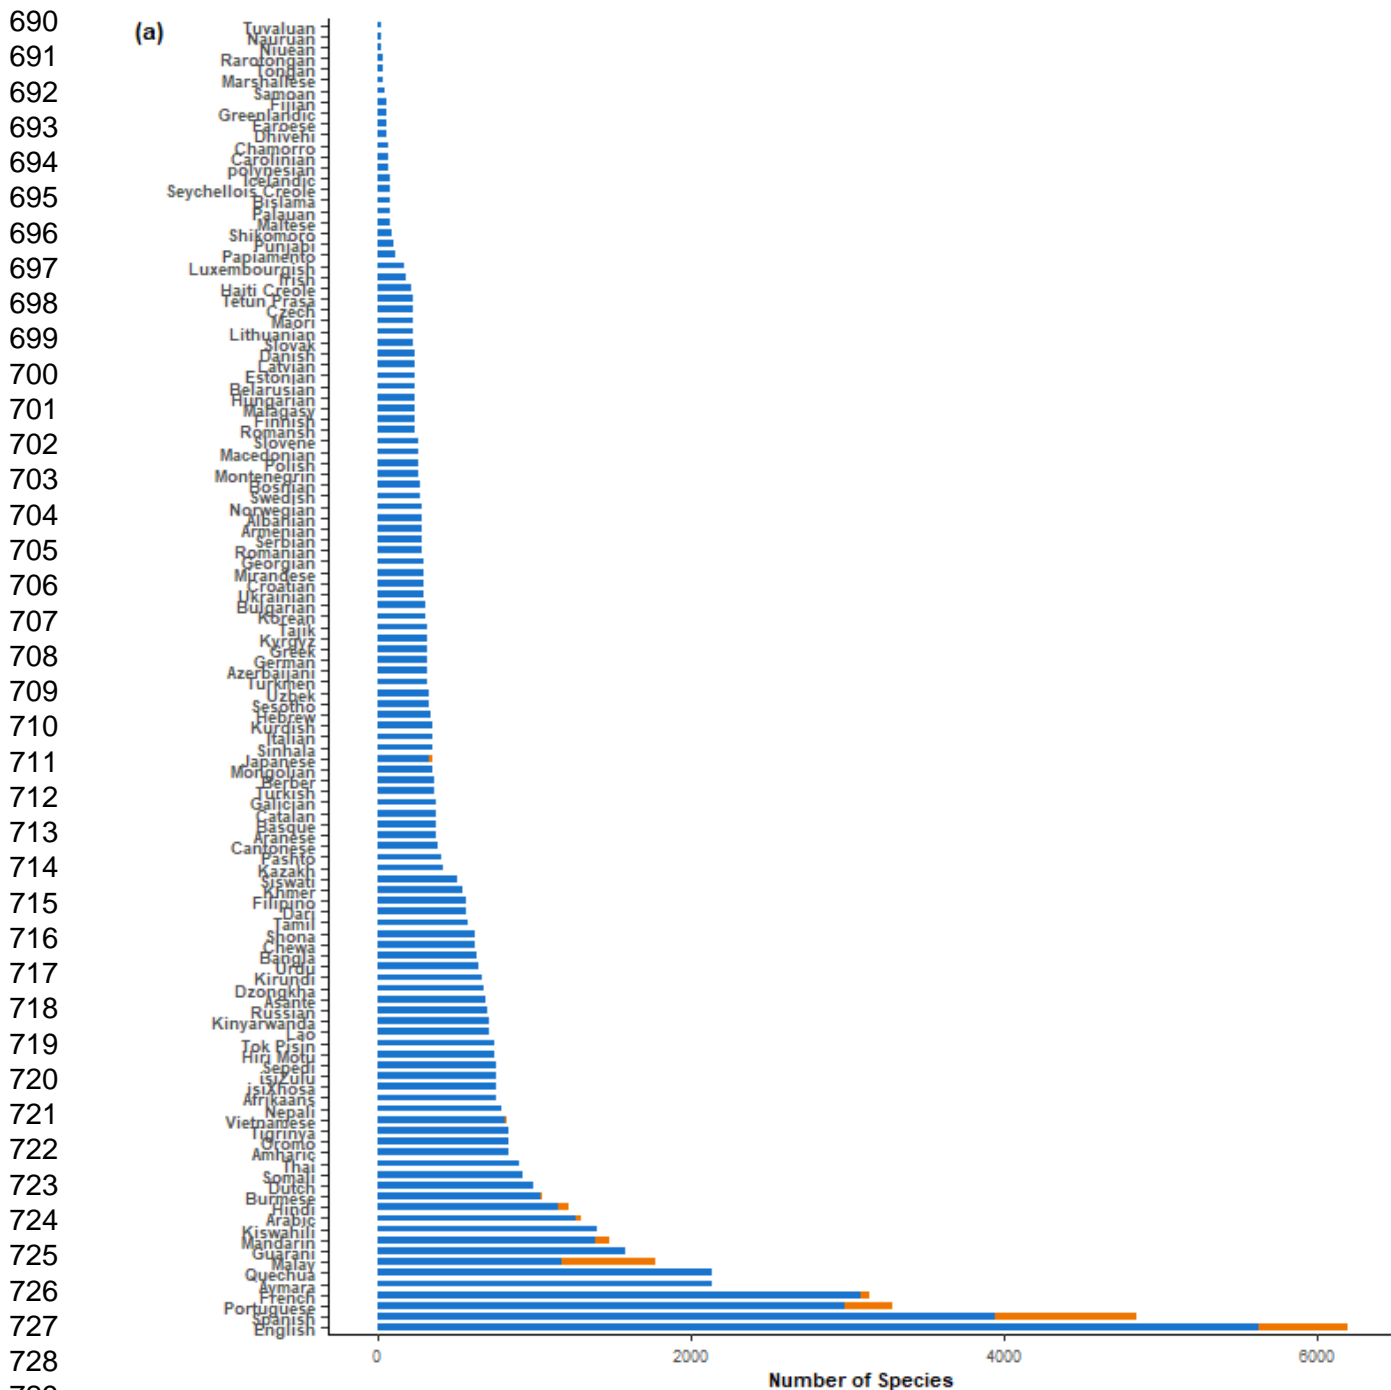

690  
691  
692  
693  
694  
695  
696  
697  
698  
699  
700  
701  
702  
703  
704  
705  
706  
707  
708  
709  
710  
711  
712  
713  
714  
715  
716  
717  
718  
719  
720  
721  
722  
723  
724  
725  
726  
727  
728  
729  
730  
731  
732  
733  
734  
735  
736  
737  
738

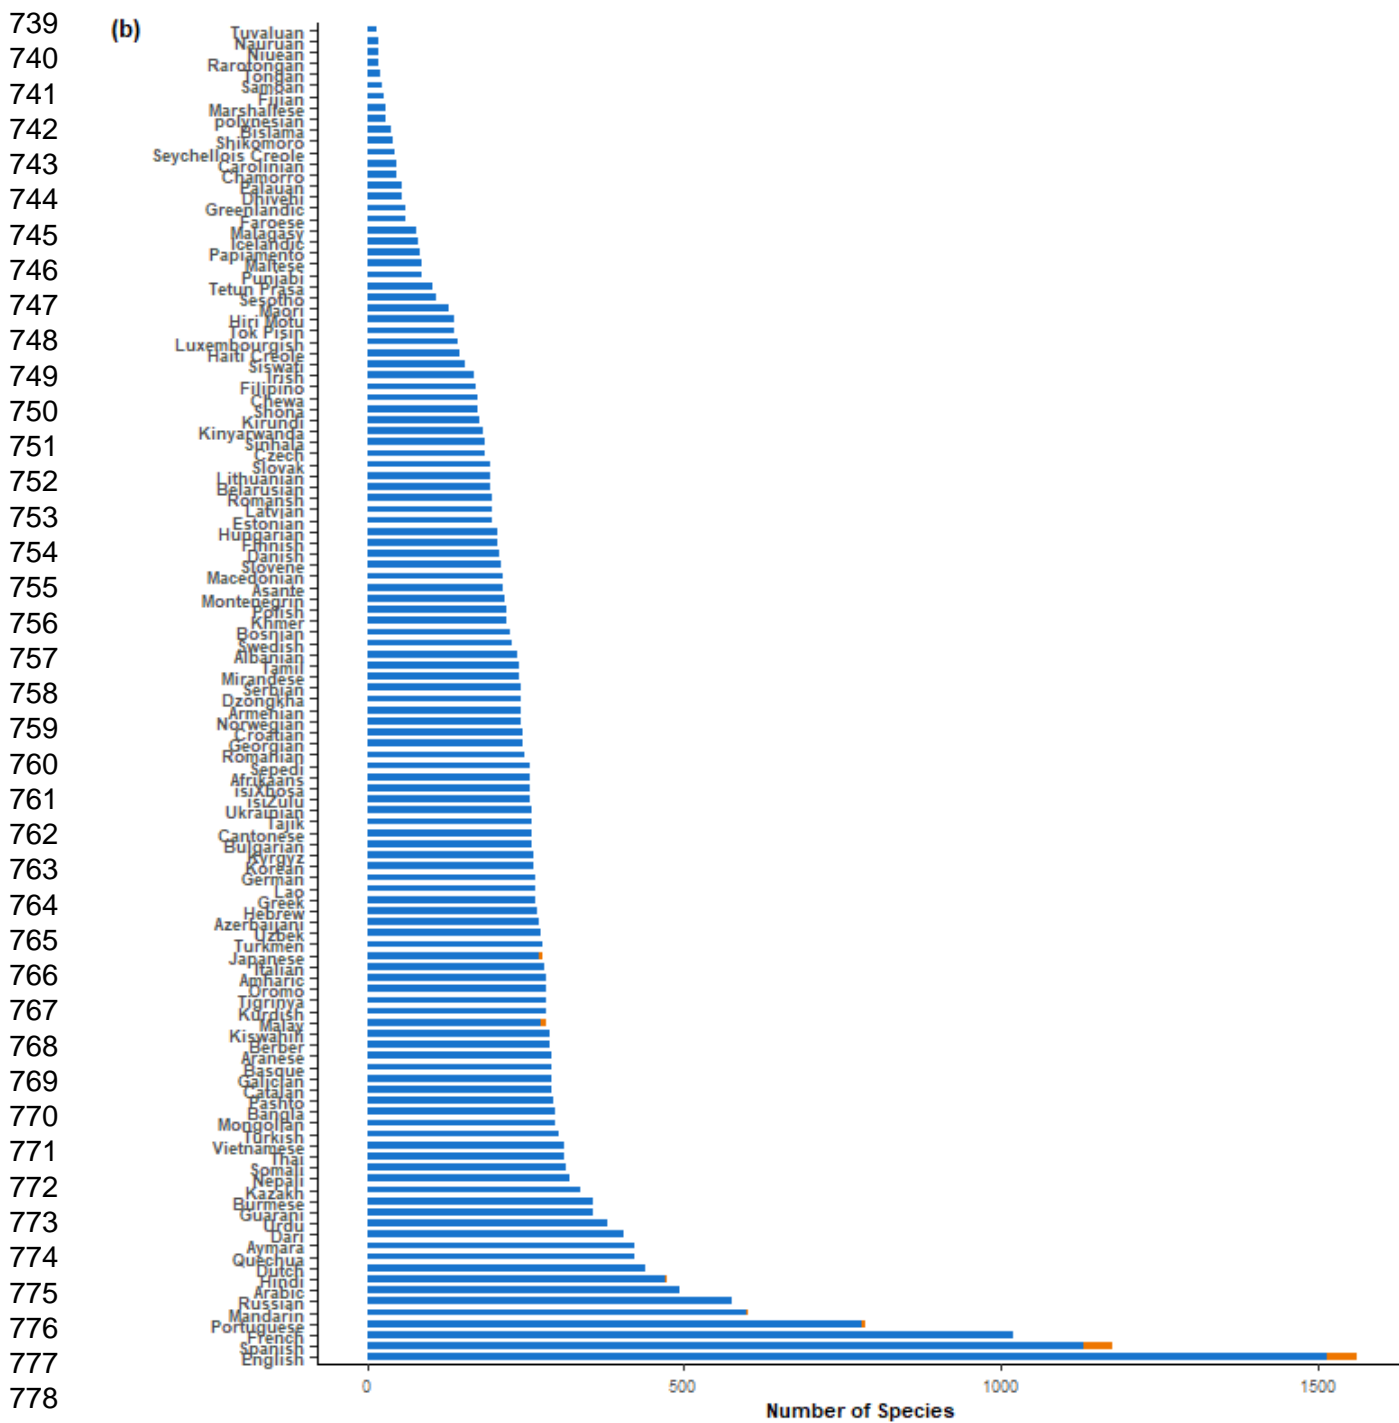

739  
740  
741  
742  
743  
744  
745  
746  
747  
748  
749  
750  
751  
752  
753  
754  
755  
756  
757  
758  
759  
760  
761  
762  
763  
764  
765  
766  
767  
768  
769  
770  
771  
772  
773  
774  
775  
776  
777  
778  
779  
780  
781  
782  
783  
784  
785  
786  
787

788  
789  
790  
791  
792  
793  
794  
795  
796  
797  
798  
799  
800  
801  
802  
803  
804  
805  
806  
807  
808  
809  
810  
811  
812  
813  
814  
815  
816  
817  
818  
819  
820  
821  
822  
823  
824  
825  
826  
827  
828  
829  
830  
831  
832  
833  
834  
835  
836

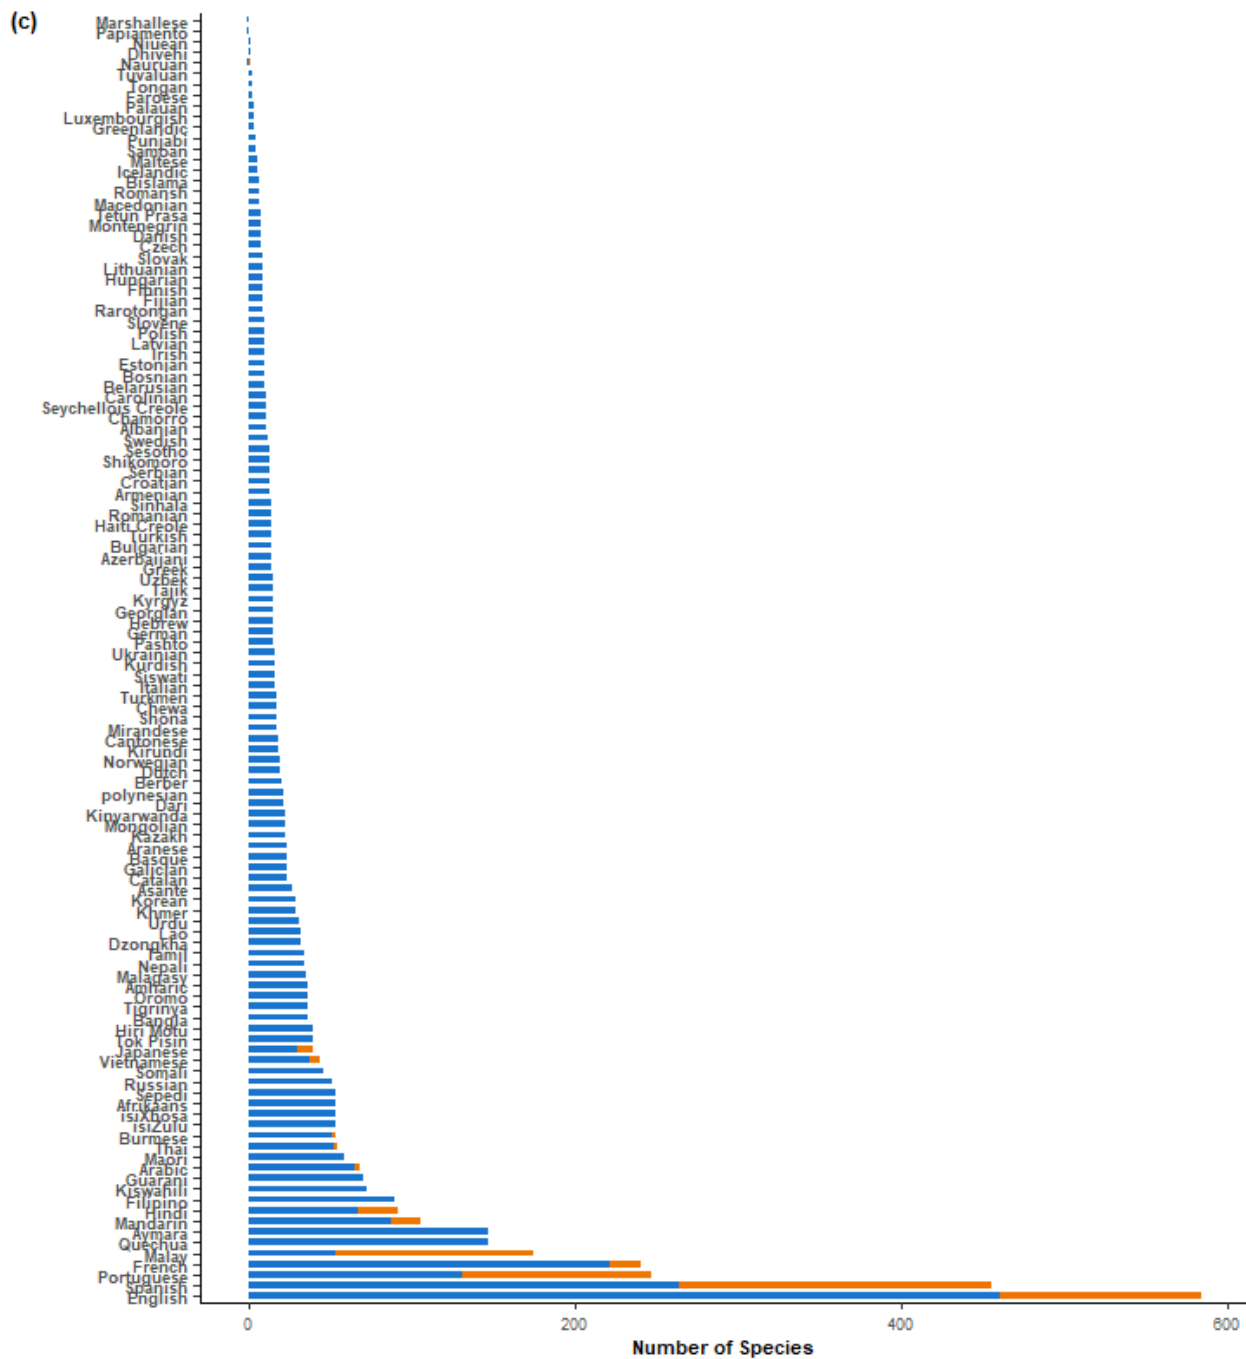



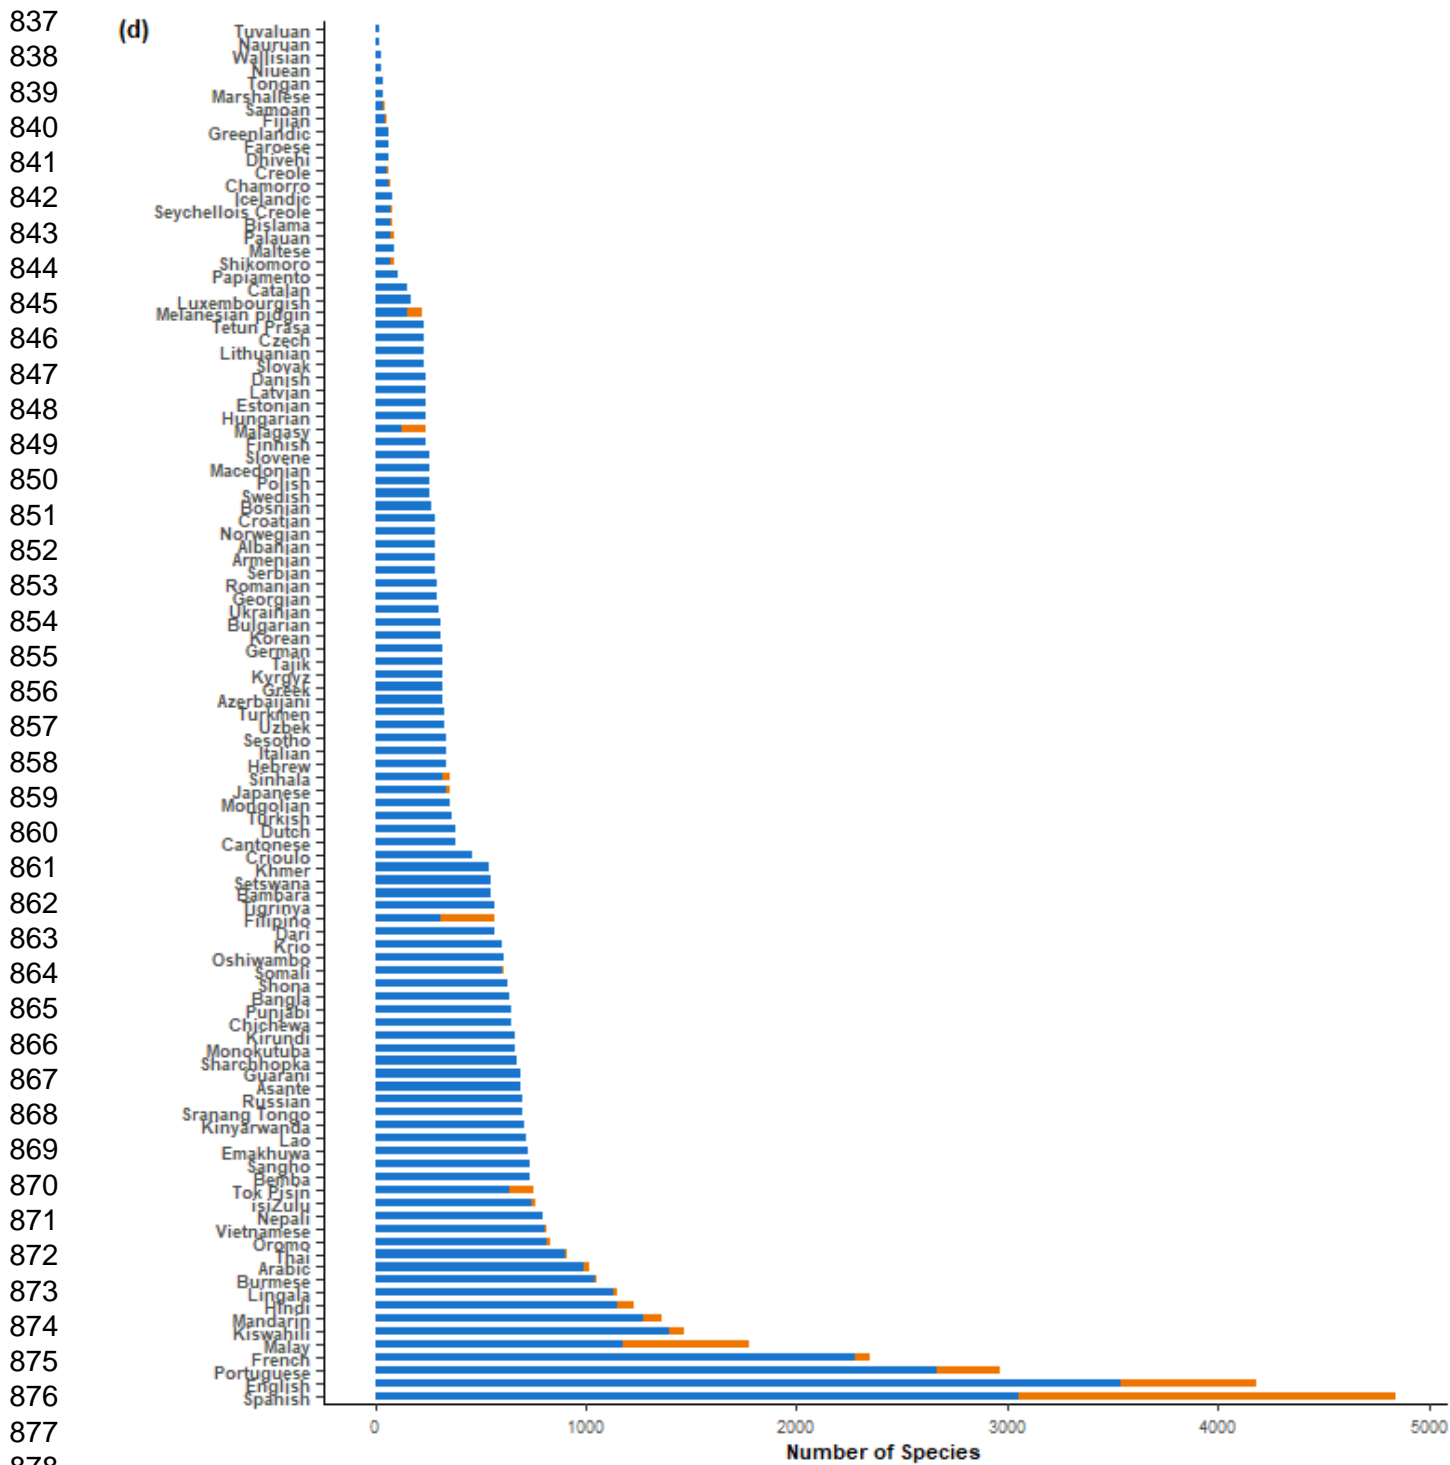

877  
878  
879  
880  
881  
882  
883  
884  
885

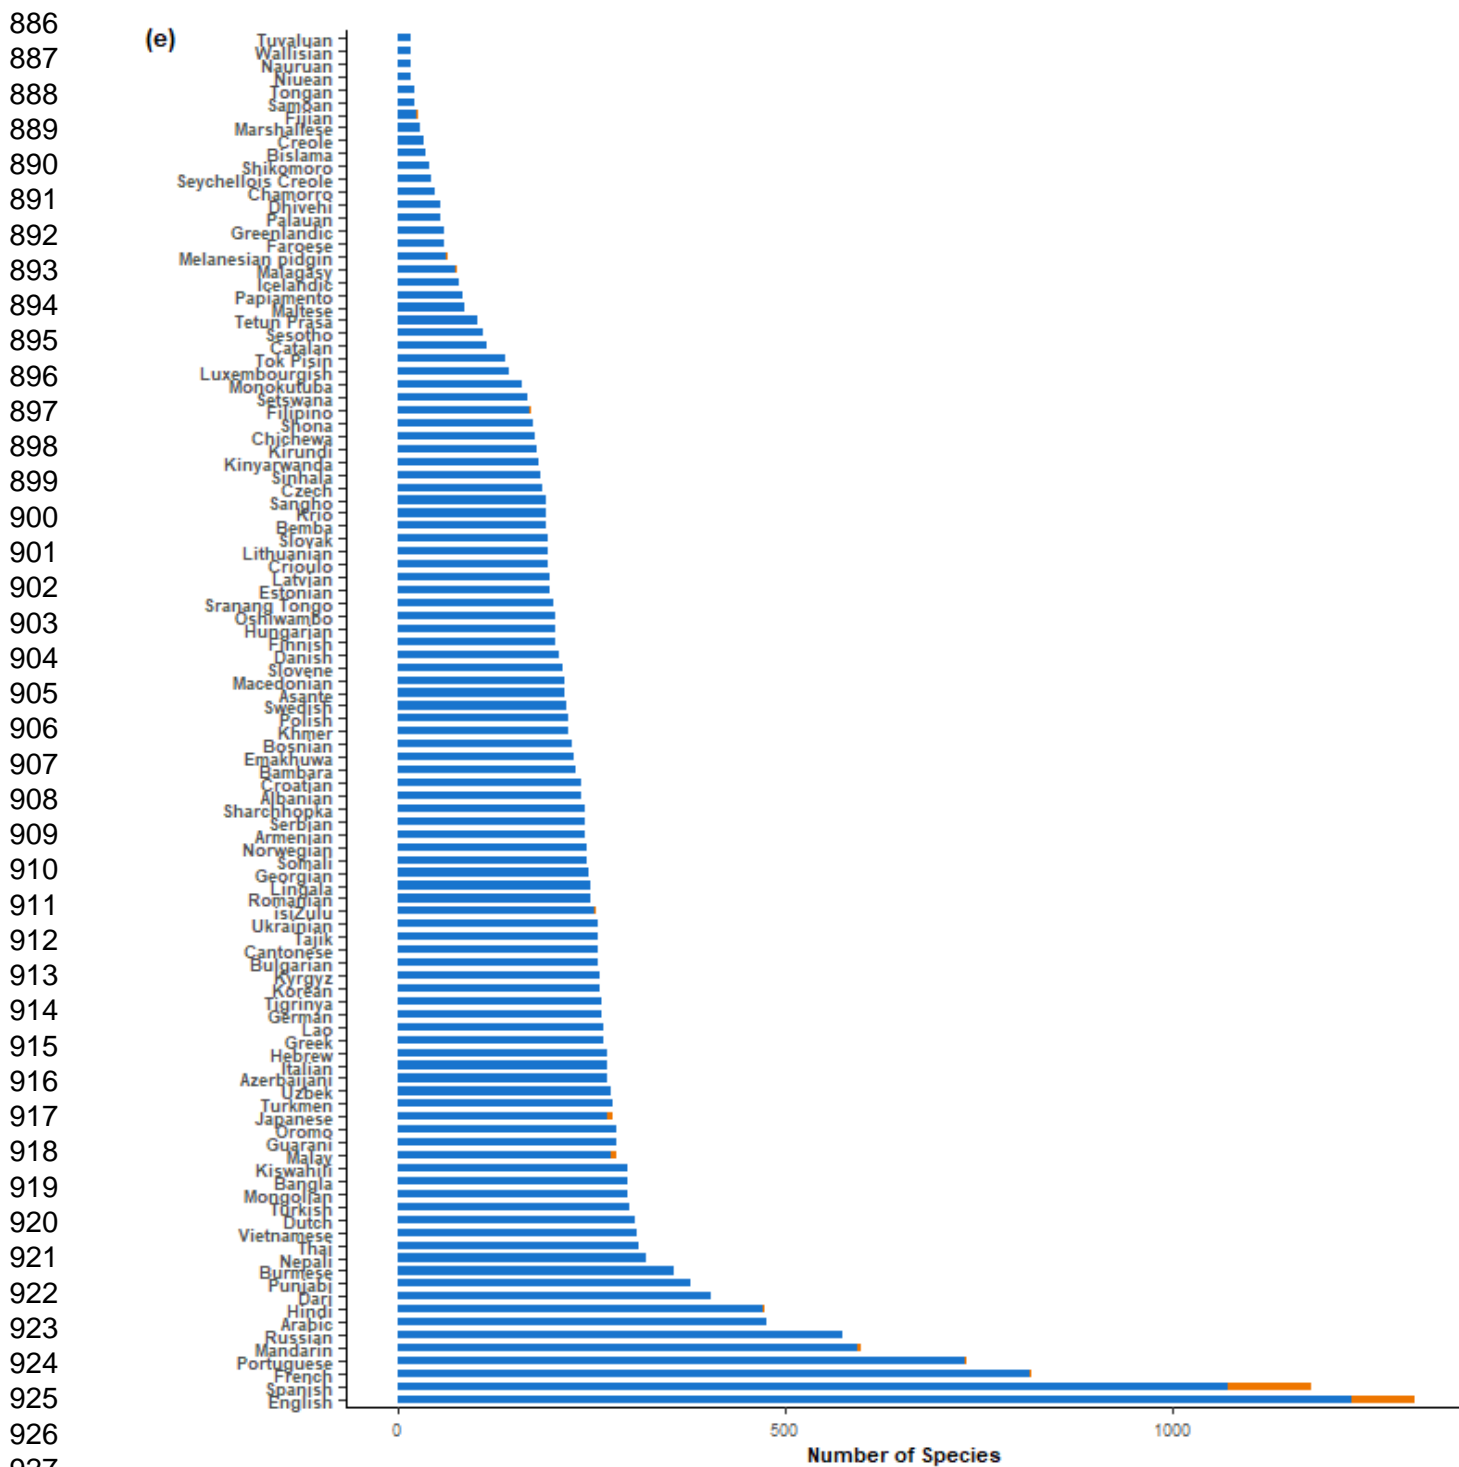

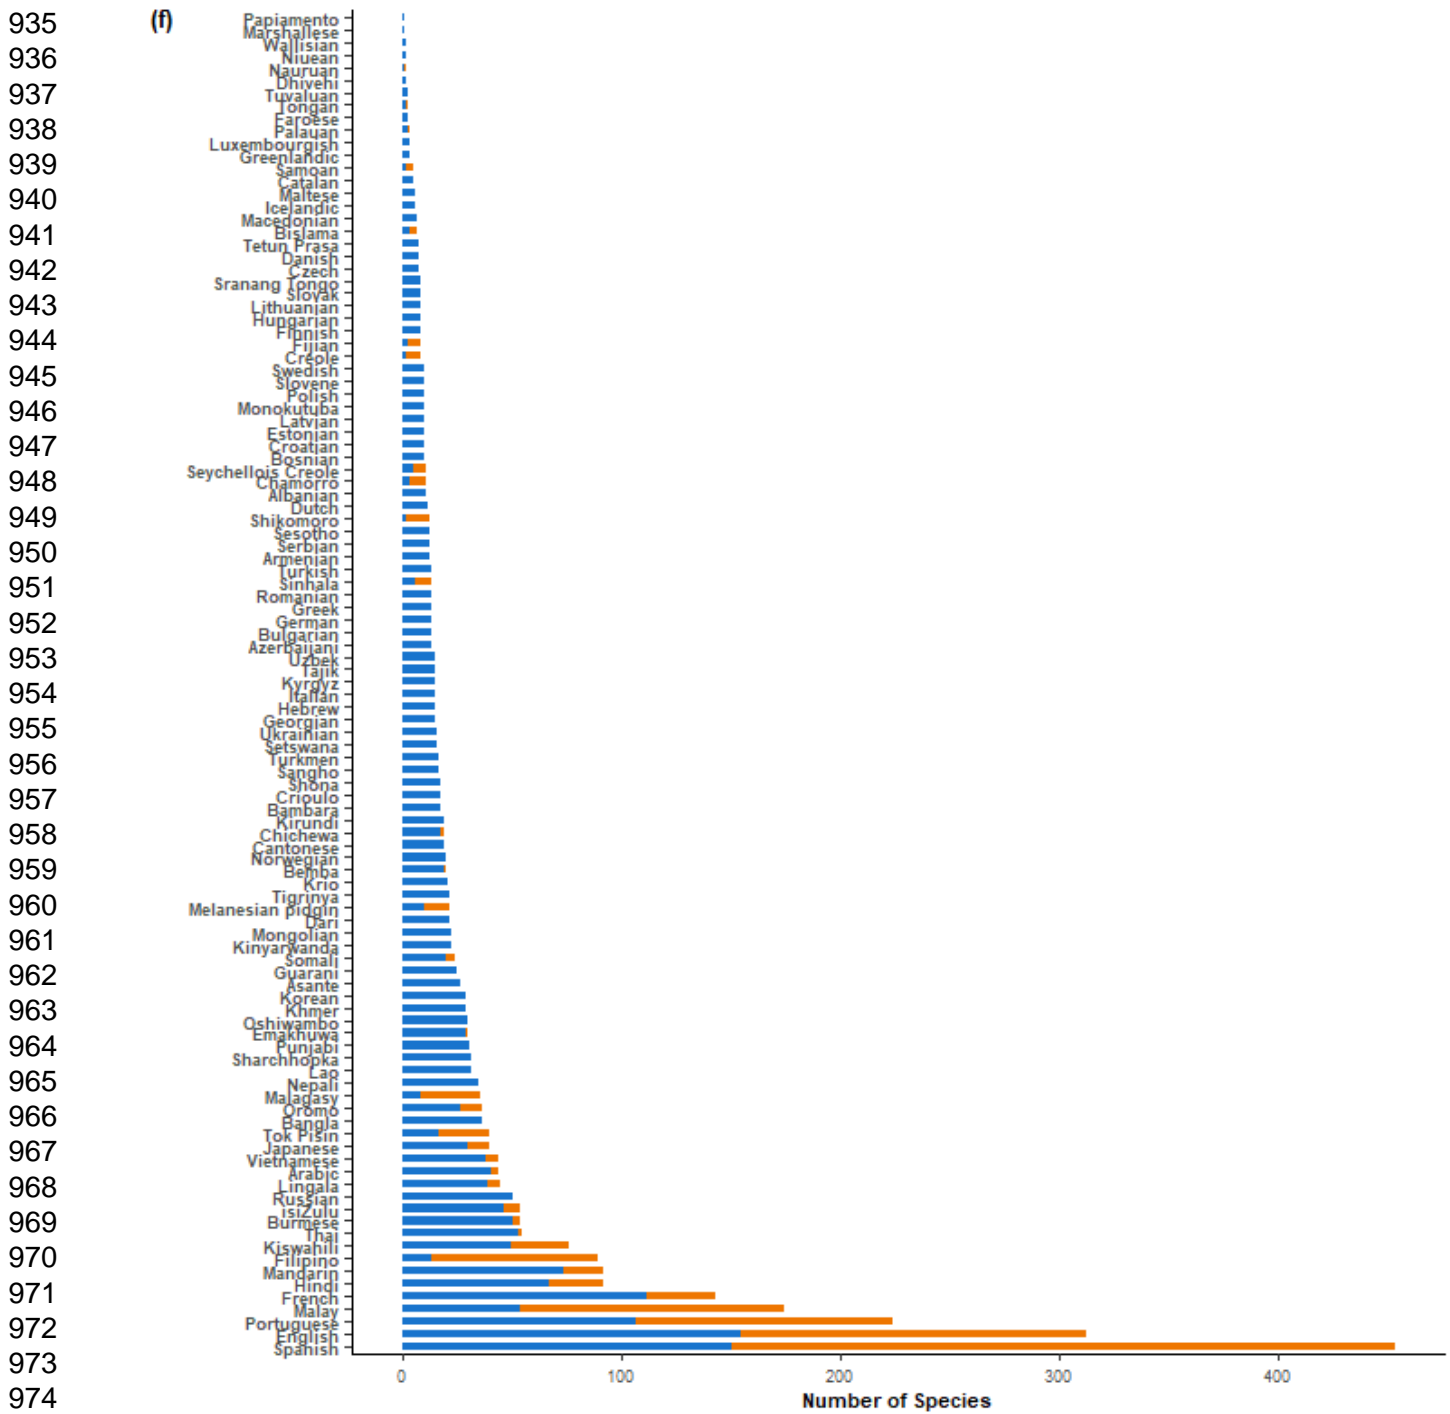

976 **Figure S4.** Number of bird species associated with a particular language. Number of official languages  
 977 associated with (a) all species (n=10,863), (b) migratory species (n=1,939), and (c) threatened species  
 978 (n=1,427). The same analysis but for most spoken languages in each country for (d) all species, (e)  
 979 migratory species, and (f) threatened species. The number of species associated only with the language is  
 980 shown in orange and the number of species associated with the language and one or more other languages  
 981 is shown in blue.

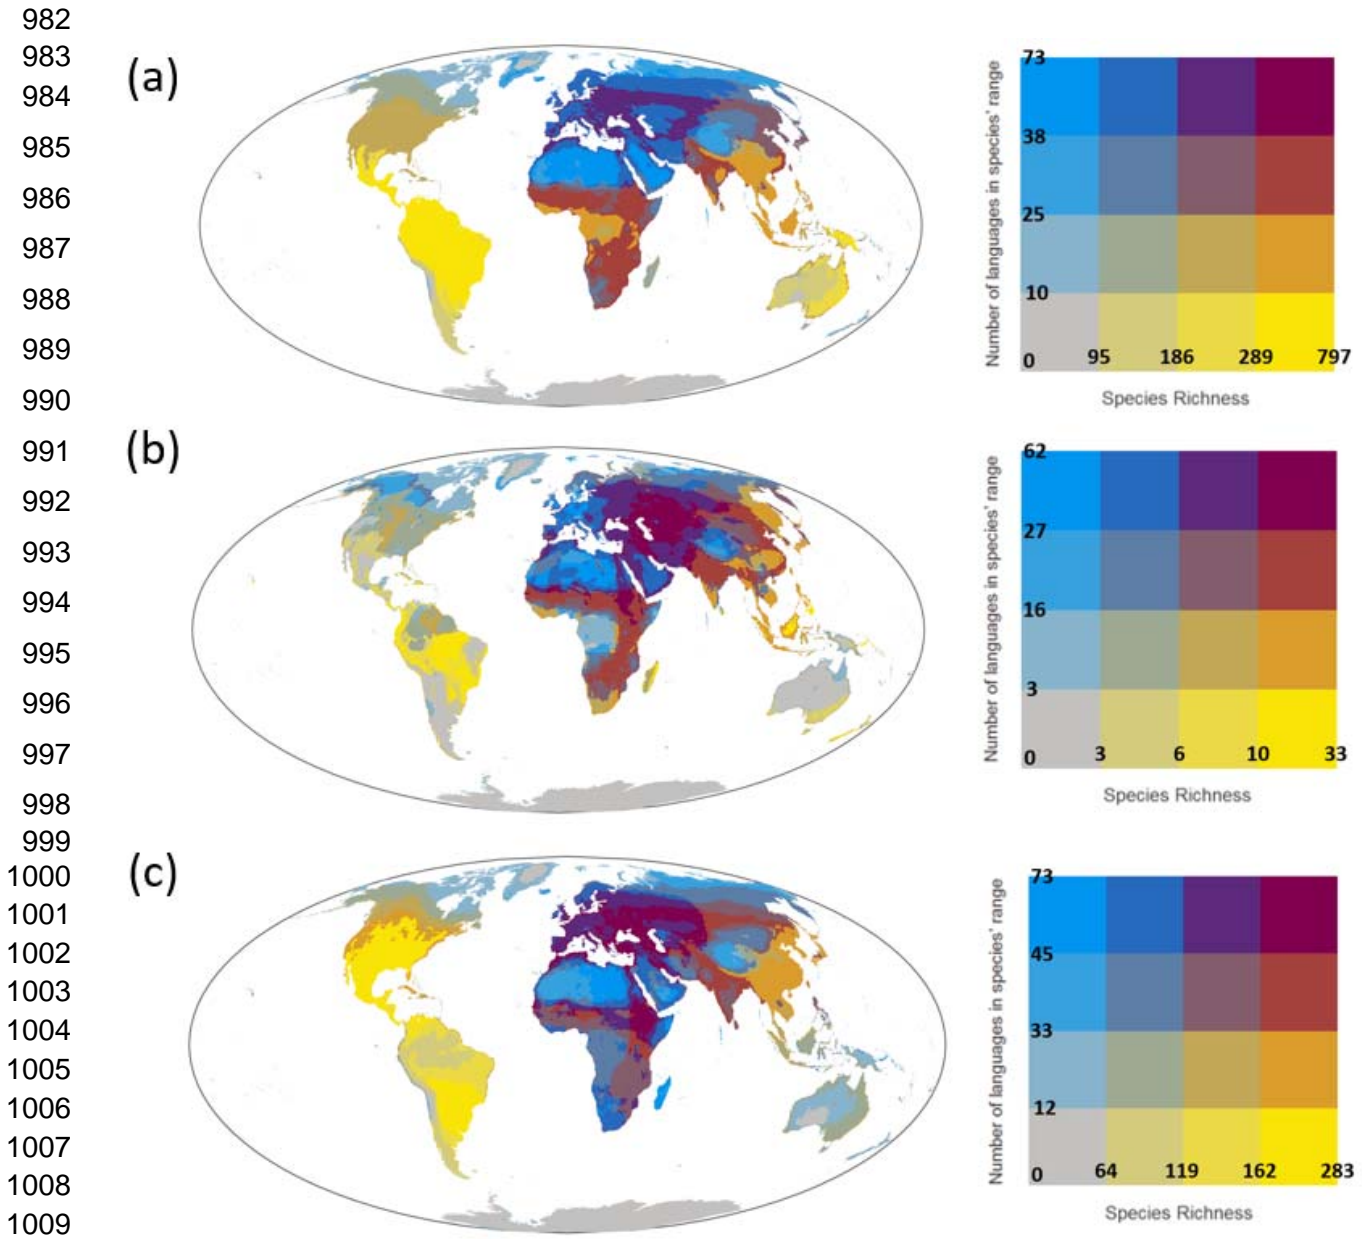

1010 **Figure S5.** Bivariate maps showing the number of species (species richness) and the mean number of  
1011 languages within the distribution of species found within each 30km × 30km grid cell for (a) all bird  
1012 species, (b) threatened bird species, and (c) migratory bird species. The number of languages within each  
1013 species' distribution was calculated using the most spoken languages in each country.  
1014

## 1015 **References**

- 1016 1. BirdLife International and NatureServe, Bird species distribution maps of the world (2020),  
1017 (available at <http://www.birdlife.org/>).
- 1018 2. C. Strobl, in *Encyclopedia of GIS*, S. Shekhar, H. Xiong, Eds. (Springer, Minneapolis, USA, 2008), pp.  
1019 891–898.
- 1020 3. United States Central Intelligence Agency, *The World Factbook* (Central Intelligence Agency,  
1021 Minnesota, United States, 2020; [https://www.cia.gov/library/publications/the-world-](https://www.cia.gov/library/publications/the-world-factbook/fields/402.html)  
1022 [factbook/fields/402.html](https://www.cia.gov/library/publications/the-world-factbook/fields/402.html)).
- 1023 4. J. R. Allan *et al.*, Hotspots of human impact on threatened terrestrial vertebrates. *PLoS Biol.* **17**,  
1024 e3000158 (2019).
- 1025 5. ESRI, Arc GIS Desktop (2011), (available at <https://www.arcgis.com/index.html>).
- 1026 6. R Foundation for Statistical Computing, R: A language and environment for statistical computin  
1027 (2020), (available at <https://www.r-project.org/>).
- 1028 7. D. Bates, M. Mächler, B. M. Bolker, S. C. Walker, Fitting linear mixed-effects models using lme4. *J.*  
1029 *Stat. Softw.* **67** (2015), doi:10.18637/jss.v067.i01.
- 1030
- 1031
- 1032
